**Analysis of the immunological biomarker profile during acute Zika virus infection reveals the overexpression of CXCL10, a chemokine already linked to neuronal damage**

**Short Title:** CXCL10 overexpression in Acute Zika Virus Infection

Felipe Gomes Naveca<sup>1,2¶\*</sup>, Gemilson Soares Pontes<sup>3&</sup>, Aileen Yu-hen Chang<sup>4&</sup>, George Allan Villarouco da Silva<sup>2,7</sup>, Valdinete Alves do Nascimento<sup>1</sup>, Dana Cristina da Silva Monteiro<sup>2</sup>, Marineide Souza da Silva<sup>2</sup>, Lígia Fernandes Abdalla<sup>2,5</sup>, João Hugo Abdalla Santos<sup>6</sup>, Tatiana Amaral Pires de Almeida<sup>1</sup>, Matilde del Carmen Contreras Mejía<sup>1</sup>, Tirza Gabrielle Ramos de Mesquita<sup>7</sup>, Helia Valeria de Souza Encarnação<sup>7</sup>, Matheus de Souza Gomes<sup>8</sup>, Laurence Rodrigues Amaral<sup>8</sup>, Ana Carolina Campi-Azevedo<sup>9</sup>, Jordana Graziela Coelho-dos-Reis<sup>9</sup>, Lis Ribeiro do Vale Antonelli<sup>9</sup>, Andréa Teixeira-Carvalho<sup>9&</sup>, Olindo Assis Martins-Filho<sup>9¶\*</sup>, Rajendranath Ramasawmy<sup>7,10</sup>

**1** Programa de Pós-Graduação em Biologia da Interação Patógeno-Hospedeiro, Instituto Leônidas e Maria Deane – Fiocruz Amazônia, Manaus, Amazonas, Brazil

**2** Programa de Pós-Graduação em Imunologia Básica e Aplicada, Universidade Federal do Amazonas, Manaus, Amazonas, Brazil

**3** Instituto Nacional de Pesquisas da Amazônia, Manaus, Amazonas, Brazil

**4** George Washington University, Washington, DC, United States of America

**5** Universidade do Estado do Amazonas, Manaus, Amazonas, Brazil

**6** Hospital Adventista de Manaus, Manaus, Amazonas, Brazil

**7** Fundação de Medicina Tropical – Dr Heitor Vieira Dourado, Manaus, Amazonas, Brazil

8 Universidade Federal de Uberlândia, Patos de Minas, Minas Gerais, Brazil

9 Centro de Pesquisas René Rachou – Fiocruz Minas, Belo Horizonte, Minas Gerais,  
Brazil

10 Universidade Nilton Lins, Manaus, Amazonas, Brazil

\* [felipe.naveca@fiocruz.br](mailto:felipe.naveca@fiocruz.br) (FGN)

\* [oamfilho@cpqrr.fiocruz.br](mailto:oamfilho@cpqrr.fiocruz.br) (OAMF)

<sup>¶</sup>These authors contributed equally to this work.

<sup>&</sup>These authors also contributed equally to this work.

## 1 **Abstract**

2 Infection with Zika virus (ZIKV) manifests in a broad spectrum of disease ranging from  
3 mild illness to severe neurological complications. To define immunologic correlates of  
4 ZIKV infection, we characterized the levels of circulating cytokines, chemokines and  
5 growth factors in 54 infected patients of both genders, at five different time-points after  
6 symptoms onset using microbeads multiplex immunoassay; statistical analysis and data  
7 mining compared to 100 age-matched controls. ZIKV-infected patients present a  
8 striking systemic inflammatory response with high levels of pro-inflammatory  
9 mediators. Despite the strong inflammatory pattern, IL-1Ra and IL-4 are also induced  
10 during acute infection. Interestingly, the inflammatory cytokines, IL-1 $\beta$ , IL-13, IL-17,  
11 TNF- $\alpha$ , IFN- $\gamma$ ; chemokines, CXCL8, CCL2, CCL5; and the growth factor G-CSF  
12 display a bimodal distribution accompanying viremia. While this is the first manuscript  
13 to document bimodal distributions of viremia in ZIKV infection, bimodal viremia has  
14 been documented in other viral infections with primary viremia peaks during mild  
15 systemic disease and a secondary viremia with distribution of the virus to organs and

16 tissues. Moreover, biomarker network analysis demonstrated distinct dynamics in  
17 consonance with the bimodal viremia profiles at different time-points during ZIKV  
18 infection. Such robust cytokine and chemokine response has been associated with  
19 blood-brain barrier permeability and neuroinvasiveness in other flaviviral infections.  
20 High-dimensional data analysis further established CXCL10, a chemokine involved in  
21 fetal neuron apoptosis and Guillain-Barré syndrome, as the most promising biomarker  
22 of acute ZIKV infection for a potential clinical application.

23

## 24 **Author Summary**

25 Infection with Zika virus manifests in a broad spectrum of disease ranging from mild  
26 illness to severe neurological complications. This study characterized the levels of  
27 circulating cytokines, chemokines and growth factors in Zika-infected patients showing  
28 an inflammatory immune response. Specifically, this study identified a chemokine,  
29 CXCL10, known to be involved in fetal neuron apoptosis and Guillain-Barré syndrome,  
30 as the most promising biomarker to characterize acute Zika virus infection.

31

## 32 **Introduction**

33 The Zika virus (ZIKV) is an arthropod-borne *Flavivirus*, transmitted mainly by the bite  
34 of female *Aedes* mosquitos, that usually causes a mild illness characterized by  
35 conjunctivitis, pruritus, muscle and joint pain, rash and slight fever [1]. Outbreaks of  
36 ZIKV infection were first recorded in Micronesia and later in French Polynesia, where  
37 atypical manifestations were initially documented, including the Guillain-Barré  
38 Syndrome [2,3]. In Brazil, ZIKV infection during pregnancy was linked to an unusual  
39 increase in the number of microcephaly cases [4]. Following the Brazilian report of  
40 congenital malformations, the number of microcephaly cases in French Polynesia were

41 reanalyzed, and a connection with ZIKV was further established [5]. The broad  
42 spectrum of fetal clinical manifestations resulting from ZIKV infection lead to a new  
43 classification termed Zika Congenital Syndrome [6].  
44 Host immune response plays an important role in the clinical course of patients with  
45 viral infection. Particularly, cellular immunity and key components of the innate  
46 immune response, such as interferons and other cytokines/chemokines, play an essential  
47 role in limiting the viral spread [7]. To date, only two studies describing immune  
48 mediators in Zika-infected patients have been reported [8,9]. In Tappe et al, reliable  
49 immunological biomarker profile during acute infection could not be established due to  
50 the small sample size. Kam et al. describes immune markers from a cohort from  
51 Campinas, Brazil showing inflammatory immune response and several immune  
52 mediators specifically higher in ZIKV-infected patients, with levels of CXCL10, IL-10, and  
53 HGF differentiating between patients with and without neurological complications. Kam et  
54 al. also found higher levels of CXCL10, IL-22, MCP-1, and TNF- $\alpha$  were observed in  
55 ZIKV-infected pregnant women carrying babies with fetal growth associated  
56 malformations.  
57 In this study, we evaluated the immune response during the acute ZIKV infection by  
58 analysis the serum levels of cytokines, chemokines and growth factors from an adult  
59 cohort from Manaus, Brazil of 54 ZIKV-infected cases and 100 controls over five time  
60 points during symptomatic ZIKV infection. We present the time course of cytokine  
61 response in relation to viremia and identify a chemokine that may serve as a biomarker  
62 of acute ZIKV infection, providing new insights into ZIKV neuropathogenesis.

63

## 64 **Methods**

### 65 **Study Population and Design**

66 We used a non-probabilistic convenience sampling and a cross-sectional experimental  
67 design, together with robust statistical analysis and data mining, for the evaluation of  
68 the immunological biomarker profile during acute ZIKV infection. In the first semester  
69 of 2016, a total of 54 suspected ZIKV-infected cases (29 non-pregnant females and 25  
70 males, all adults) were recruited at Hospital Adventista de Manaus, Amazonas state,  
71 Brazil. All patients presented a maculopapular rash, with or without fever, and at least  
72 one of the following symptoms: pruritus, arthralgia, joint swelling or conjunctival  
73 hyperemia, within five days after the symptoms onset. Age-matched non-infected (NI)  
74 controls, females (46) and males (54), were enrolled for comparison and basic  
75 characteristics, including physical examination and virological findings are provided.  
76 Comprehensive laboratory records were available for 21 patients (15 male and six  
77 female), including routine laboratory tests.

78

#### 79 **Ethics Statement**

80 The study protocol was approved by the Ethics Committee of the Universidade do  
81 Estado do Amazonas (CAAE: 56745116.6.0000.5016) and all subjects included  
82 provided written informed consent.

83

#### 84 **Differential molecular diagnosis of Zika and viral load estimative**

85 Serum samples were sent to Fiocruz Amazônia and tested for ZIKV (envelope coding  
86 region) [10], Chikungunya (CHIKV) [11] and Dengue (DENV) [12] by RT-qPCR.  
87 Samples positive for CHIKV or DENV were excluded. Sample inclusion criteria also  
88 required the internal control (spiked MS2 bacteriophage) to display a Ct value between  
89 30-32. The viremia was indirectly estimated by RT-qPCR and reported as  $1/Ct*100$ .

90

91 **Dengue virus serology**

92 Serum samples were tested for previous exposure to DENV with Serion ELISA classic  
93 Dengue Virus IgG (Institut Virion/Serion GmbH, Germany).

94

95 **Microbeads assay for serum biomarkers**

96 High-performance microbeads 27-plex assay (Bio-Rad, Hercules, CA, USA) was  
97 employed for detection and quantification of multiple targets, including: CXCL8 (IL-8);  
98 CXCL10 (IP-10); CCL11 (Eotaxin); CCL3 (MIP-1 $\alpha$ ); CCL4 (MIP-1 $\beta$ ); CCL2 (MCP-  
99 1); CCL5 (RANTES); IL-1 $\beta$ , IL-6, TNF- $\alpha$ ; IL-12; IFN- $\gamma$ , IL-17; IL-1Ra (IL-1 receptor  
100 antagonist); IL-2; IL-4; IL-5; IL-7; IL-9; IL-10; IL-13; IL-15; FGF-basic; PDGF;  
101 VEGF; G-CSF and GM-CSF. Samples were tested according to the manufacturer's  
102 instructions on a Bio-Plax 200 instrument (Bio-Rad). The serum levels of IL-2, IL-7,  
103 and IL-15 were below the detection limits in several samples and were excluded of  
104 further analysis. The results were expressed as pg/mL.

105

106 **Statistical analysis and Data mining**

107 Statistical analyses were initially performed using GraphPad Prism (GraphPad Software  
108 6.0, San Diego, CA, USA). Outliers within each measurement group were identified by  
109 the ROUT Method (Q=1%) and removed. Cleaned data was then used for the evaluation  
110 of Gaussian distribution with D'Agostino & Pearson omnibus normality test.  
111 Comparative analysis of the clinical records was carried out by Fisher's exact test. The  
112 analysis of biomarker levels between NI controls *vs.* ZIKV-infected cases, and between  
113 genders, was performed by Mann-Whitney test. Multivariate correlations for biomarker  
114 levels and routine laboratory tests were analyzed with the nonparametric Spearman's

115 test (alpha 0.05) running on the JMP Software, v13.1.0 (SAS Institute, Cary, NC, USA).  
116 Correlations (Spearman  $\rho$ ) were represented by a color map matrix.  
117 The dynamics of viremia, chemokines, cytokines and growth factors were evaluated  
118 using the median value of each analyte. Comparative analysis of the biomarkers was  
119 carried out by Kruskal-Wallis followed by Dunn's post-test. For all tests, significant  
120 differences were considered at two-tailed  $p < 0.05$ .  
121 Data management strategies were applied to identify general and time-specific profiles.  
122 Biomarker signature analysis was carried out as previously described [13]. Radar charts  
123 were assembled to compile the biomarker signature of NI controls and ZIKV-infected  
124 cases applying the 75<sup>th</sup> percentile as threshold. Venn diagram scrutiny was carried out to  
125 identify attributes, along with the timeline of the symptoms onset  
126 <http://bioinformatics.psb.ugent.be/webtools/Venn/>. Cytoscape software v3.2.0  
127 (<http://www.cytoscape.org/>) was employed for visualizing and integrating multiple  
128 attributes into circular nodal networks. Connecting edges were drawn to underscore the  
129 association as positive (solid line) or negative (dashed line). The biomarker cluster  
130 pattern was defined by heatmaps assembled using R software (heatmap.2 function;  
131 v3.0.1). Decision tree algorithms were generated with WEKA software v3.6.11  
132 (University of Waikato, New Zealand) to identify root and branch attributes,  
133 segregating patients from controls. ROC curves were built to define the cut-off and  
134 biomarkers with better performance to discriminate ZIKV-infected patients from NI  
135 controls. Performance indices (co-positivity, co-negativity, positive and negative  
136 likelihood ratio) were calculated using the MedCalc software v7.3 (Ostend, Belgium).

137

## 138 **Results**

### 139 **Demographics, clinical records and virological data**

140 The 54 Brazilian Zika cases, 29 non-pregnant females (median age 38 years, IQR 27.5 –  
141 46.5) and 25 males (median age 37 years, IQR 30 – 50), were enrolled between the first  
142 and the fifth day after the symptoms onset. A group of 100 non-infected control subjects  
143 who were residents of Manaus, Amazonas, Brazil were also included (46 females  
144 (median age 28 years, IQR 23 – 36) and 54 males (median age 29.5 years, IQR 23 –  
145 36)). The median viremia expressed as  $1/Ct \times 100$  was 2.9 (min=2.7; max=4.2; IQR: 2.8  
146 – 3.0). The frequency of specific ZIKV symptoms was similar between men and woman  
147 with the only exception that men had increase frequency of fever compared to woman  
148 (100% versus 67%,  $p=0.005$ ) (Table 1). The DENV IgG testing showed that 94.4%  
149 (51/54) of the patients were positive; two had an undetermined result and one male  
150 subject was negative.

151

152 **Table 1.** Demographical aspects, clinical records and virological status  
153 of ZIKV-infected patients

| Parameters                    | All             | Females             | Males           | p            |
|-------------------------------|-----------------|---------------------|-----------------|--------------|
| <b>Non-infected controls</b>  |                 |                     |                 |              |
| n                             | 100             | 46                  | 54              | NA           |
| Age (years)                   | 29.0<br>(23-36) | 28.0<br>(23-36)     | 29.5<br>(23-36) | 0.58         |
| <b>ZIKV-infected patients</b> |                 |                     |                 |              |
| n                             | 54              | 29                  | 25              | n.a.         |
| Age (years)                   | 37.5<br>(29-48) | 38.0<br>(27.5-46.5) | 37.0<br>(30-50) | 0.79         |
| Days of symptoms onset        | 2.5<br>(2-4)    | 2.0<br>(1-4)        | 3.0<br>(2-4)    | 0.32         |
| Rash                          | 95.0%           | 94.4%               | 95.5%           | 1.00         |
| Fever                         | 85.0%           | 66.7%               | 100.0%          | <b>0.005</b> |
| Myalgia                       | 82.5%           | 83.3%               | 81.8%           | 1.00         |
| Conjunctival hyperemia        | 75.0%           | 66.7%               | 81.8%           | 0.30         |



|                           |                  |                  |                  |      |
|---------------------------|------------------|------------------|------------------|------|
| <b>Pruritus</b>           | 70.0%            | 66.7%            | 72.7%            | 0.73 |
| <b>Headache</b>           | 65.0%            | 66.7%            | 63.6%            | 1.00 |
| <b>Arthralgia</b>         | 60.0%            | 72.2%            | 50.0%            | 0.20 |
| <b>Joint swelling</b>     | 25.0%            | 33.3%            | 18.2%            | 0.30 |
| <b>Vomiting or nausea</b> | 25.0%            | 33.3%            | 18.2%            | 0.30 |
| <b>Diarrhea</b>           | 17.5%            | 27.8%            | 9.1%             | 0.21 |
| <b>Lymphadenopathy</b>    | 12.5%            | 11.1%            | 13.6%            | 1.00 |
| <b>Viremia</b>            | 2.9<br>(2.8-3.0) | 2.9<br>(2.8-3.0) | 2.9<br>(2.8-3.0) | 0.86 |

154 Data are reported as median and Interquartile Range (IQR) for age, days of symptoms  
155 onset and viremia. Statistical differences were assessed by Mann-Whitney test.  
156 Comparative analysis of clinical records observed in females and males was carried out  
157 by Fisher's exact test. Significant differences were considered at  $p < 0.05$  for  
158 comparisons between females vs males and are underscored by **bold/underlined**  
159 format. Viremia is expressed as  $1/Ct * 100$  as described in material and methods. "NA"=  
160 not applicable.

161

### 162 **Correlation of immunological biomarkers during acute ZIKV infection with** 163 **routine laboratory tests**

164 The results of 45 continuous variables including immunological biomarkers; routine  
165 laboratory tests; age; viremia and symptoms onset were analyzed (Fig 1). Overall,  
166 moderate correlations were observed for several variables, whereas the strongest  
167 correlations were observed between  $TNF-\alpha$  and CCL5 (Spearman  $\rho$  0.8245) and  
168 Lymphocytes (%) and Neutrophils (%) (Spearman  $\rho$  -0.8084). All results were  
169 represented in a color map matrix, where statistically supported associations ( $p < 0.05$ ),  
170 regarding the routine laboratorial tests and immunological biomarkers, were highlighted  
171 (inserted table in Fig 1).

172

173 **Fig 1. Immunological biomarkers correlations with the results of routine**  
174 **laboratorial tests, age, viremia, and symptoms.** The nonparametric Spearman's test  
175 was applied to evaluate multiple correlations between immunological biomarkers and  
176 the results of routine laboratorial tests. A color map matrix was plotted showing the  
177 strength and direction of these correlations (-1 blue, to +1 red). Strongly supported  
178 correlations ( $p < 0.05$ ) between immunological biomarkers and routine tests are  
179 highlighted in the inserted table.

180

### 181 **ZIKV-infected patients display high levels of circulating biomarkers**

182 Elevated levels of pro-inflammatory cytokines (IL-1 $\beta$ , IL-6, TNF- $\alpha$ , IFN- $\gamma$  and IL-17,  
183 except IL-12 that was higher in controls), chemokines (CXCL8, CCL11, CCL3, CCL4,  
184 CCL2, CCL5 and CXCL10) and growth factors (FGF-basic, PDGF, VEGF, G-CSF and  
185 GM-CSF) were found in ZIKV-infected cases (Fig 2, light gray panels), whereas higher  
186 levels of IL-5 and IL-13 in controls (Fig 2, dark gray panels). Interestingly, the levels of  
187 IL-4 and IL-1Ra were also higher among patients. No differences were observed for the  
188 IL-9 and IL-10 (Fig 2, white panels). A similar pattern was observed when results were  
189 stratified by gender, although infected males presented significant lower levels of  
190 CCL3, CCL4, CCL5, IL-17, FGF-basic and GM-CSF. No significant differences were  
191 observed between female and male controls (Table 2).

192

### 193 **Fig 2. Panoramic Overview of Serum Chemokines, Cytokines and Growth Factors**

194 **Early After Zika Virus Infection in Adults.** Serum biomarkers (CXCL8, CCL11,  
195 CCL3, CCL4, CCL2, CCL5, CXCL10, IL-1 $\beta$ , IL-6, TNF- $\alpha$ , IL-12, IFN- $\gamma$ , IL-17, IL-  
196 1Ra, IL-4, IL-5, IL-9, IL-10, IL-13, FGF-basic, PDGF, VEGF, G-CSF and GM-CSF)  
197 were measured in Zika virus-infected patients (ZIKV= ■, n=54) and non-infected

198 subjects (NI= □, n=100) by high performance Luminex 27-plex assay as described in  
 199 methods. Data expressed as pg/mL are displayed in box and whiskers (10-90 percentile)  
 200 plots. Comparative analysis between NI vs. ZIKV was performed by Mann-Whitney test  
 201 and significant differences at  $p < 0.05$  underscored by connecting lines. Colored  
 202 backgrounds highlighted increased (light gray), decreased (dark gray) and unaltered  
 203 (white) levels of serum biomarkers in ZIKV as compared to NI.

204

205 **Table 2. Serum Chemokines, Cytokines and Growth Factors Early After**  
 206 **Zika Virus Infection in Adult Females and Males**

| Analytes                       | Females (F), n=29      |                            | $p$ (1)       | Males (M), n=25        |                           | $p$ (2)       | $p$ (3)       | Score ZIKV/NI |     |
|--------------------------------|------------------------|----------------------------|---------------|------------------------|---------------------------|---------------|---------------|---------------|-----|
|                                | NI                     | ZIKV                       |               | NI                     | ZIKV                      |               |               | (F)           | (M) |
| <b>CXCL8</b>                   | 0.87<br>(0.54-1.67)    | 2.26<br>(1.57-3.26)        | <b>0.0001</b> | 0.98<br>(0.70-1.93)    | 2.30<br>(1.19-3.11)       | <b>0.0018</b> | 0.5669        | 2.6           | 2.3 |
| <b>CCL11</b>                   | 16.44<br>(9.29-22.22)  | 48.94<br>(30.12-61.91)     | <b>0.0001</b> | 16.65<br>(10.62-25.20) | 43.82<br>(29.11-56.95)    | <b>0.0001</b> | 0.3488        | 3.0           | 2.6 |
| <b>CCL3</b>                    | 0.59<br>(0.41-0.86)    | 1.15<br>(0.80-1.32)        | <b>0.0001</b> | 0.65<br>(0.45-1.13)    | 0.89<br>(0.67-1.07)       | <b>0.0469</b> | <b>0.0205</b> | 1.9           | 1.4 |
| <b>CCL4</b>                    | 7.28<br>(4.56-12.20)   | 28.76<br>(18.76-35.67)     | <b>0.0001</b> | 5.94<br>(3.75-9.79)    | 20.18<br>(12.63-26.64)    | <b>0.0001</b> | <b>0.0162</b> | 4.0           | 3.4 |
| <b>CCL2</b>                    | 2.08<br>(1.00-4.97)    | 20.73<br>(13.45-34.70)     | <b>0.0001</b> | 2.46<br>(1.94-7.15)    | 21.98<br>(11.86-32.34)    | <b>0.0001</b> | 0.9862        | 10.0          | 8.9 |
| <b>CCL5</b>                    | 15.17<br>(11.36-34.98) | 82.77<br>(64.75-108.00)    | <b>0.0001</b> | 17.00<br>(9.83-25.70)  | 34.06<br>(23.66-65.81)    | <b>0.0001</b> | <b>0.0001</b> | 5.5           | 2.0 |
| <b>CXCL10</b>                  | 232<br>(128-434)       | 71,219<br>(32,899-148,407) | <b>0.0001</b> | 218<br>(109-392)       | 44,645<br>(10,423-69,757) | <b>0.0001</b> | 0.1030        | 307           | 205 |
| <b>IL-1<math>\beta</math></b>  | 0.52<br>(0.24-0.96)    | 0.93<br>(0.56-1.19)        | <b>0.0176</b> | 0.52<br>(0.29-1.00)    | 0.77<br>(0.61-1.14)       | 0.1511        | 0.5374        | 1.8           | 1.5 |
| <b>IL-6</b>                    | 0.29<br>(0.20-0.57)    | 0.79<br>(0.63-1.00)        | <b>0.0001</b> | 0.28<br>(0.21-0.55)    | 0.81<br>(0.52-1.73)       | <b>0.0001</b> | 0.1944        | 2.7           | 2.9 |
| <b>TNF-<math>\alpha</math></b> | 9.76<br>(6.10-20.20)   | 35.87<br>(25.45-44.08)     | <b>0.0001</b> | 10.08<br>(6.45-22.62)  | 26.93<br>(15.02-41.84)    | <b>0.0015</b> | 0.1101        | 3.7           | 2.7 |
| <b>IL-12</b>                   | 1.26<br>(0.51-2.30)    | 0.63<br>(0.22-1.66)        | 0.0554        | 1.39<br>(0.96-2.17)    | 0.34<br>(0.09-1.08)       | 0.0001        | 0.1895        | 0.5           | 0.2 |
| <b>IFN-<math>\gamma</math></b> | 14.97<br>(9.63-24.54)  | 31.91<br>(26.39-38.65)     | <b>0.0001</b> | 19.79<br>(14.14-27.31) | 26.41<br>(23.61-35.97)    | <b>0.0035</b> | 0.4283        | 2.1           | 1.3 |
| <b>IL-17</b>                   | 3.84<br>(2.21-7.53)    | 7.88<br>(6.28-9.02)        | <b>0.0001</b> | 3.57<br>(2.50-6.76)    | 5.96<br>(4.41-7.15)       | <b>0.0114</b> | <b>0.0092</b> | 2.1           | 1.7 |
| <b>IL-1Ra</b>                  | 11.81<br>(7.81-28.66)  | 47.00<br>(34.03-65.59)     | <b>0.0001</b> | 12.33<br>(8.95-36.13)  | 54.94<br>(30.77-115.10)   | <b>0.0001</b> | 0.3623        | 4.0           | 4.5 |
| <b>IL-4</b>                    | 0.27<br>(0.20-0.39)    | 0.81<br>(0.59-0.86)        | <b>0.0001</b> | 0.26<br>(0.17-0.41)    | 0.73<br>(0.53-0.90)       | <b>0.0001</b> | 0.6890        | 3.0           | 2.8 |
| <b>IL-5</b>                    | 3.16<br>(1.67-5.02)    | 1.50<br>(0.40-1.61)        | <b>0.0001</b> | 4.70<br>(2.00-5.35)    | 1.38<br>(1.07-1.61)       | <b>0.0001</b> | 0.5792        | 0.5           | 0.3 |

|                  |                     |                            |               |                     |                            |               |               |     |     |
|------------------|---------------------|----------------------------|---------------|---------------------|----------------------------|---------------|---------------|-----|-----|
| <b>IL-9</b>      | 2.21<br>(1.19-4.11) | 3.10<br>(1.69-5.72)        | 0.0783        | 2.62<br>(1.59-4.69) | 1.42<br>(1.18-3.83)        | 0.0837        | 0.0518        | 1.4 | 0.5 |
| <b>IL-10</b>     | 1.73<br>(0.75-3.39) | 2.11<br>(1.65-3.22)        | 0.1046        | 1.95<br>(1.51-3.02) | 2.25<br>(1.52-3.41)        | 0.5478        | 0.9571        | 1.2 | 1.2 |
| <b>IL-13</b>     | 0.75<br>(0.37-1.34) | 0.48<br>(0.22-0.57)        | <b>0.0135</b> | 0.98<br>(0.80-1.57) | 0.57<br>(0.37-0.57)        | <b>0.0001</b> | 0.3634        | 0.6 | 0.6 |
| <b>FGF-basic</b> | 1.84<br>(1.01-3.14) | <u>4.34</u><br>(3.71-5.27) | <b>0.0001</b> | 2.24<br>(1.28-3.73) | <u>3.24</u><br>(2.13-4.24) | <b>0.0468</b> | <b>0.0014</b> | 2.4 | 1.4 |
| <b>PDGF</b>      | 359<br>(125-585)    | 1,012<br>(616-1,933)       | <b>0.0001</b> | 258<br>(196-403)    | 823<br>(416-1,578)         | <b>0.0001</b> | 0.3670        | 2.8 | 3.2 |
| <b>VEGF</b>      | 2.87<br>(1.78-6.29) | 6.72<br>(4.18-16.33)       | <b>0.0001</b> | 3.70<br>(2.17-4.97) | 6.26<br>(3.66-15.21)       | <b>0.0005</b> | 0.5668        | 2.3 | 1.7 |
| <b>G-CSF</b>     | 1.86<br>(1.04-2.86) | 5.96<br>(4.43-8.05)        | <b>0.0001</b> | 1.83<br>(1.19-3.29) | 4.94<br>(3.42-7.66)        | <b>0.0001</b> | 0.2400        | 3.2 | 2.7 |
| <b>GM-CSF</b>    | 0.87<br>(0.52-2.00) | <u>3.76</u><br>(3.03-4.64) | <b>0.0001</b> | 1.35<br>(0.54-2.16) | <u>2.88</u><br>(1.73-3.91) | <b>0.0003</b> | <b>0.0256</b> | 4.4 | 2.1 |

207 Data are reported as median levels (IQR) in pg/mL. Statistical analysis was performed by Mann-  
 208 Whitney test and significance reported as p(1), p(2) and p(3) values for comparisons between NI vs  
 209 ZIKV females, NI vs ZIKV males and ZIKV females vs ZIKV males, respectively. Significant  
 210 differences between NI vs ZIKV are underscored in **bold** format. Differences between ZIKV females vs  
 211 ZIKV males are highlighted by **bold-underlined** format. No significant differences were observed  
 212 between NI females vs NI males. Score represents the fold change (analyte median value in infected  
 213 patient divided by analyte median value in controls) segregated by gender.

214

## 215 **Bimodal viremia is accompanied by increased levels of a defined group of** 216 **biomarkers**

217 Viremia and biomarkers were assessed at different time-points (Day 1 post-infection  
 218 denoted as D1 etc.) D1 (n=11); D2 (n=13); D3 (n=10); D4 (n=09) and D5 (n=05). A  
 219 bimodal distribution was observed, with two viremia peaks at D2 and D4, reaching the  
 220 lowest levels at D5 (Fig 3, gray panel). Dynamics of CCL5, TNF- $\alpha$ , IFN- $\gamma$ , IL-17 and  
 221 G-CSF were closely related to viremia (Fig 3A). A similar bimodal distribution was  
 222 observed for IL-1 $\beta$  and IL-13 (Fig 3B). The highest levels of CXCL8 and CCL2 were  
 223 observed at D1 and D2 (Fig 3C). An inverse correlation was observed for IL-12, IL-10  
 224 and VEGF (Fig 3D), where the highest levels coincide with the lowest viremias. The  
 225 levels of CCL3, CXCL10, IL-6 and FGF-basic display a distinct pattern, with the lowest  
 226 levels observed at D3, coinciding with the first drop of viremia (Fig 3E). A valley at D4

227 followed by an increase at D5 was observed for CCL11, CCL4, IL-1Ra, and IL-4 (Fig  
228 3F), and unique patterns were observed for IL-5, IL-9, PDGF, and GM-CSF (Fig 3G).

229

230 **Fig 3. Rhythms of Viremia, Chemokines, Cytokines and Growth Factors Early**  
231 **After Zika Virus Infection in Adults.** Cross-sectional follow-up of viremia and serum  
232 biomarkers was carried out in Zika virus-infected patients categorized according to the  
233 time (days) upon symptoms onset (D1, n=11; D2, n=13; D3, n=10; D4 n=09 and D5  
234 n=05). Viremia ( $1/CT \times 100$ ) displayed a bimodal profile with similar waves at D2 and  
235 D4 (gray panel). Distinct patterns were identified for clusters of biomarkers as they  
236 displayed kinetic curves shaping a bimodal wave at D2 and higher wave [ $\uparrow$ ] at D4  
237 (panel A, for CCL5, TNF- $\alpha$ , IFN- $\gamma$ , IL-17 and G-CSF); a bimodal profile with similar  
238 waves at D2 and D4 (panel B, IL-1 $\beta$  and IL-13); a wave at D2 and a valley at D3 (panel  
239 C, CXCL8 and CCL2); a midpoint wave at D3 (panel D, IL-12, IL-10 and VEGF); an  
240 unimodal valley at D3 (panel E, CCL3, CXCL10, IL-6 and FGF-basic); a valley at D4  
241 (panel F, CCL11, CCL4, IL-1Ra and IL-4) or an unique pattern (panel G, IL-5, IL-9,  
242 PDGF and GM-CSF). Data are displayed as global maximum equalized median values  
243 of the serum concentrations (pg/mL) for each biomarker.

244

245 Biomarkers were also evaluated in controls, and the IQR are represented by dashed lines  
246 (Fig 4). Most of biomarkers' levels differ between patients and controls at all time-  
247 points, except for IL-10 at D1 and D2, IL-1 $\beta$  at D3. No differences were observed for  
248 IL-9.

249

250 **Fig 4. Kinetics of Viremia, Serum Chemokines, Cytokines and Growth Factors**  
251 **Early After Zika Virus Infection in Adults.** Cross-sectional analysis of viremia and

252 serum biomarkers was performed in Zika virus-infected patients categorized according  
253 to the time (days) upon symptoms onset (D1, n=11; D2, n=13; D3, n=10; D4 n=09 and  
254 D5 n=05). Data expressed as pg/mL are displayed in box and whiskers (10-90  
255 percentile) plots. Multiple comparisons amongst distinct time-points upon symptoms  
256 onset were performed by Kruskal-Wallis followed by Dunn's post-test and significant  
257 differences at  $p < 0.05$  underscored by D1, D2, D3 and D4 as they correspond to specific  
258 time-points. Comparative analysis with non-infected controls (NI) was also carried out  
259 at each time-point by Mann-Whitney test and significant differences at  $p < 0.05$   
260 underscored by asterisks (\*). Reference ranges for each biomarker were established as  
261 interquartile ranges (25<sup>th</sup>-75<sup>th</sup> percentiles) observed in NI (dashed lines). Distinct  
262 patterns were identified for clusters of biomarkers as they displayed kinetic curves  
263 shaping a bimodal wave at D2 and higher wave [↑] at D4 (CCL-5, TNF- $\alpha$ , IFN- $\gamma$ , IL-17  
264 and G-CSF); a bimodal profile with similar waves at D2 and D4 (IL-1 $\beta$  and IL-13); a  
265 wave at D2 and a valley at D3 (CXCL8 and CCL2); a midpoint wave at D3 (IL-12, IL-  
266 10 and VEGF); an unimodal valley at D3 (CCL3, CXCL10, IL-6 and FGF-basic); a  
267 valley at D4 (CCL11, CCL4, IL-1Ra and IL-4) or an unique pattern (IL-5, IL-9, PDGF  
268 and GM-CSF).

269

### 270 **ZIKV infection elicited a set of general and timeline-specific biomarkers**

271 The biomarker levels were used to build a signature (Fig 5, left panels) as described in  
272 the methods section. A significant difference in the overall profile was observed in  
273 ZIKV-infected cases (Fig 5, top-left panel). Furthermore, the radar chart revealed that  
274 19/24 (79%) biomarkers were highly induced by ZIKV infection (Fig 5, bottom-left  
275 panel). Almost all biomarkers analyzed were found in levels above the global median in  
276 more than 75% of the infected patients.

277 Venn diagram analysis showed that four chemokines (CCL4, CCL2, CCL5, CXCL10);  
278 two cytokines (IL-6, IL-4) and two growth factors (PDGF, G-CSF) were significantly  
279 induced in all time-points (Fig 5, right panel). Of note, TNF-  $\alpha$  appears as a single  
280 biomarker at the intersection of the viremia peaks (D2 and D4). In contrast, IL-10 is the  
281 only unregulated biomarker at viremia valleys (D3 and D5) while increased levels of  
282 IL-12 appears at D5 (Fig 5, inserted table).

283

284 **Fig 5. General and Timeline Biomarkers upon Symptoms Onset Early After Zika**  
285 **Virus Infection in Adults.** Biomarker signatures of NI ( $\square$ ) and ZIKV ( $\blacksquare$ ) were  
286 constructed as described in methods. Data are presented in radar charts as the proportion  
287 of subjects with serum biomarker levels above the global population median values (NI  
288 plus ZIKV). Biomarkers with levels above the global median in more than 75% of  
289 subjects were highlighted by asterisks (\*). The Venn diagram shows the intersections  
290 with common attributes as well as selective biomarkers along the timeline of symptoms  
291 onset (Day 1; Day 2; Day 3; Day 4 and Day 5). Venn diagram report summarizes  
292 selected attributes with patterns labeled as (a) universal; (b) peak of viremia; (c) valley  
293 of viremia or (d) late biomarkers (inserted table).

294

### 295 **Distinct biomarker networks are observed at different time-points**

296 Cytoscape software was used to assemble correlative analysis of immunological  
297 biomarkers. The exploratory analysis demonstrated that earlier infection was associated  
298 with more imbricate and complex biomarker networks. Most correlations at D1 and all  
299 correlations at D2 were positive (solid lines). The level of complexity decreased from  
300 D1 to D5. However, the interactions were more complex at D2 and D4, concomitant  
301 with the viremia peaks (Fig 6).

302

303 **Fig 6. Timeline Biomarker Networks Early After Zika Virus Infection in Adults.**

304 Systems integrative biology analysis of attributes was assembled using Cytoscape  
305 software platform to build circular nodal network layout for each time-point upon Zika  
306 virus infection day 1 (D1) up day 5 (D5) based on Spearman's correlation matrices.  
307 Significance was considered at  $p < 0.05$ . The timeline of networks is displayed as circular  
308 layouts to characterize the interaction along the early time-points. Colored nodes were  
309 employed to identify chemokines (CH), pro-inflammatory cytokines (PI), regulatory  
310 cytokines (RG) and growth factors (GF). Connecting edges were drawn to underscore  
311 the association between attributes, classified as positive (solid line) or negative (dashed  
312 line).

313

314 **High-dimensional data analysis elected CXCL10 as the most promising biomarker**  
315 **for a putative clinical application**

316 A heatmap matrix was constructed to evaluate the profile of biomarkers associated with  
317 ZIKV infection. This analysis demonstrated that CXCL10 clustered most patients,  
318 segregating them from controls. Additionally, a decision tree was built to identify the  
319 biomarker most able to segregate patients. This approach confirmed the heatmap  
320 observations indicating CXCL10 as the most relevant element, followed by IL-4 and  
321 VEGF. The analysis showed a very high global accuracy (99.4%) with a leave-one-out-  
322 cross-validation of 96.8% (Fig 7). The significance of these attributes (CXCL10, IL-4  
323 and VEGF) was assessed by 3D-plots and the performance of the root attribute  
324 (CXCL10) evaluated by scatter plot distribution and ROC curve analysis (Fig 7, bottom  
325 panels). CXCL10 alone lead to a very high global accuracy ranging from 0.952-0.998.  
326 Together, the results demonstrated that CXCL10 measurement ascertains 94% of the



327 patients, with no false-positive identification and outstanding indices (co-positivity, co-  
328 negativity and likelihood ratio).

329

### 330 **Fig 7. High-dimensional Data Analysis Early After Zika Virus Infection in Adults.**

331 Machine-learning high-dimensional data approaches were applied to further explore and  
332 identify feasible criteria applicable for the clinical follow-up of Zika virus infection. (A)  
333 Heatmap panels were built to verify the ability of attributes to segregate ZIKV (■) and  
334 NI (■) groups as they present low (■) or high (■) levels of serum biomarkers. Decision  
335 tree algorithms were generated define root and branch attributes to segregate patients  
336 (ZIKV=■) from non-infected controls (NI=■). Global accuracy and leave-one-out-  
337 cross-validation (LOOCV) values are provided in the figure. The root/branch attributes  
338 selected by the decision tree algorithm were compiled into a 3D-plot to verify their  
339 clusterization strength. The performance of the selected root attribute to discriminate  
340 ZIKV (●) from NI (●) was evaluated by scatter plot distribution and validated by  
341 receiver operating-characteristic indices (Area under the curve, AUC; Co-positivity, Cp;  
342 Co-negativity, Cn; Positive/Negative Likelihood Ratio, LR+/LR-).

343

### 344 **Discussion**

345 The pathogenesis of ZIKV infection is still largely unknown, and the main determinants  
346 of disease manifestations are not yet well established. Understanding serum  
347 immunomodulators during acute infection may be a first step to elucidate the  
348 mechanisms underlying ZIKV-induced immunopathology.

349 We show that the immune response during the acute phase of ZIKV infection is  
350 polyfunctional and broadly inflammatory as evidenced by significant elevated levels of  
351 IL-4, IL-17, IFN- $\gamma$ , IL-1 $\beta$ , IL-1Ra, TNF- $\alpha$  and IL-6 in patients. This is consistent with

352 findings from Kam et al [9] that also found a robust pro-inflammatory cytokine response  
353 during acute ZIKV infection with elevations of IL-18, TNF- $\alpha$ , IFN- $\gamma$ , IL-8, IL-6, GRO- $\alpha$ ,  
354 and IL-7. Alternatively, when we stratified the results by gender, ZIKV-infected males  
355 presented lower levels of CCL3, CCL4, CCL5, IL-17, FGF-basic and GM-CSF. The  
356 reason for this difference is unknown in the context of ZIKV infection, however this  
357 finding is consistent with the literature demonstrating that females tend to mount a  
358 higher innate and adaptive immune system response to viruses compared to men [14].  
359 In addition, this result may also be explained as females were sampled on average one  
360 day earlier than men with the median time from onset to diagnostic sampling (Females=  
361 day 2; Males= day 3).

362 It is possible that previous exposure to Flavivirus antigens may affect the immune  
363 response to ZIKV infection. In the present study, almost all patients (51/54) exhibited  
364 positive DENV IgG antibodies. Manaus has had several dengue epidemics, including  
365 co-circulation of different serotypes [15-17]. Moreover, the Amazonas State is endemic  
366 for Yellow Fever virus (YFV) and has a very high YFV-vaccination coverage. Thus,  
367 mostly individuals enrolled in this study have experienced previous Flavivirus exposure  
368 potentially modulating the cytokine and chemokine responses. These differences in  
369 prior Flavivirus exposure may account for some differences in cytokine and chemokine  
370 profiles shown by Kam et al. that examined a Brazilian cohort of patients from  
371 Campinas, Brazil where Yellow Fever vaccination was not required by the government  
372 at the time of their study as it is in Manaus, Brazil.

373 Similar to our results, comparable immune response induced during the acute phase has  
374 previously been described in infections caused by ZIKV and other Flaviviruses,  
375 including YFV, DENV and West Nile virus [8,18-20]. In the case of ZIKV infection,  
376 the mechanism of inflammatory immune response is not clearly delineated. The

377 immune response may be triggered by viral upregulation of expression of pattern  
378 recognition receptors (PRRs) engaged in downstream pathways and inflammatory  
379 antiviral response such as IRF7, IFN- $\alpha$ , IFN- $\beta$ , and CCL5 [7]. Interestingly, we showed  
380 a strong positive correlation between IFN- $\alpha$  and CCL5, suggesting that the synergistic  
381 effect of these cytokines might be crucial on the outcomes of the acute inflammation  
382 caused by ZIKV.

383 Our findings also revealed higher levels of growth factors and chemokines among  
384 patients. Likewise, increased levels of CXCL10, CCL5, CCL3 and VEGF were  
385 primarily demonstrated in patients acutely infected with ZIKV, while elevated levels of  
386 GM-CSF, CCL4, and FGF-basic biomarkers only in the recovery phase [8]. Our study  
387 demonstrated that all chemokines and growth factors analyzed were significantly  
388 increased in the acute phase in comparison with non-infected controls. In fact, the role  
389 of growth factors in the pathogenesis of arboviruses infections remains a matter of  
390 debate [20-22]. We demonstrate that a remarkable increase of FGF-basic, PDGF,  
391 VEGF, G-CSF and GM-CSF identifies the acute phase of ZIKV infection, which  
392 suggests the importance of chemokines and growth factors in the initiation and  
393 regulation of the acute-phase immune response.

394 Similarly, increased serum concentrations of both CXCL (CXCL8 and CXCL10) and  
395 CCL chemokines (CCL2, CCL3, CCL4, CCL5, and CCL11) were found in acute ZIKV  
396 infection. The role of CCL5 in the arbovirus-induced immunopathology remains a  
397 controversial issue, but this chemokine along with CCL2 and CCL3 were previously  
398 linked to severity of dengue and Japanese encephalitis virus infections, including  
399 neurological diseases and impairment of neuronal survival [23-27].

400 Furthermore, we found strong correlations between TNF- $\alpha$  and CCL5 concentrations  
401 and percentages of circulating neutrophils and lymphocytes in acute ZIKV infection.

402 This finding is likely due to the role of TNF- $\alpha$  and CCL5 in leukocyte chemo attraction  
403 [28,29] and demonstrates the important role of this cytokine and chemokine in  
404 stimulation of the innate and adaptive immune system in response to ZIKV infection.  
405 In addition, this manuscript is the first to describe the bimodal nature of viremia in acute  
406 Zika infection and corresponding peaks in inflammatory cytokine production. A  
407 biological model explaining bimodal viremia was firstly described in the classical study  
408 of Fenner's with the Mousepox virus [30]. Similarly, Flaviviruses are initially replicated  
409 in Langerhans cells at the site of inoculation and in draining regional  
410 lymph nodes. Despite a robust anti-viral innate immune response that eliminates viral  
411 infected cells, some virus particles are disseminated by blood (primary viremia).  
412 Therefore, several organs and tissues may become infected producing a second wave  
413 of viral replication that reaches blood causing a secondary viremia [31]. The equine  
414 infection by African Horse Sickness Viruses, another arbovirus of the *Orbivirus* genus,  
415 *Reoviridae* family, also shows two viremia peaks. The first peak is observed after the  
416 viral multiplication into lymph nodes, whereas the second peak is observed after viral  
417 replication in spleen, lungs and endothelial cells [32]. Several arboviruses are known  
418 to cause prolonged viremia into their natural hosts, and this is well documented for  
419 encephalitic Alphaviruses [33,34] leading to higher transmission rates for mosquito  
420 vectors. Interestingly, bimodal viremia has been found in patients after low dose live  
421 attenuated 17DD Yellow Fever vaccine administration [35]. The low dose live  
422 attenuated vaccine is hypothesized to elicit a less robust immune response in  
423 comparison to the standard dosage vaccine that does not clear the initial viremia leading  
424 to a second peak of viremia a few days later. Further research to determine if ZIKV  
425 undergoes similar processes is needed.

426 In this manuscript, we reported high levels of pro-inflammatory mediators during  
427 the acute phase of ZIKV infection. Paradoxically, although the inflammatory response  
428 leads to viral clearance, the high levels of circulating pro-inflammatory biomarkers may  
429 facilitate the transmission of viruses from circulation to the central nervous system by  
430 increasing the permeability of the blood brain barrier. This phenomenon has been  
431 already reported for the West Nile virus [36], another neurovirulent Flavivirus, and may  
432 partially explain ZIKV neuroinvasiveness.

433 Remarkably, the CXCL10 was expressed greater than 200-fold in ZIKV-infected  
434 subjects. Augmented serum levels of CXCL10 have been found during severe clinical  
435 manifestations of dengue and Yellow fever [14,18,37]. CXCL10 has also been shown to  
436 play an important role in CD-8+ T-cell recruitment as part of an anti-flaviviral response  
437 in the central nervous system to West Nile virus [38] and dengue virus [39].

438 Furthermore, CXCL10 has been previously associated as a biomarker of severity in  
439 several diseases including those caused by bacteria like *Mycobacterium tuberculosis*  
440 and *Legionella pneumophila*; protozoans like *Trypanosoma brucei*, *Leishmania major*,  
441 *Plasmodium vivax* or *Plasmodium falciparum* [40]; viral diseases such as in Simian  
442 Human Immunodeficiency Virus Encephalitis [41] and viral acute respiratory infection  
443 in healthy adults, mainly those caused by Influenza virus [42].

444 Of paramount importance, CXCL10 overexpression has been observed in non-  
445 infectious neuronal diseases like Alzheimer's and multiple sclerosis, and in infectious  
446 diseases like HIV-associated dementia [43]. Furthermore, different studies showed that  
447 the over-expression of CXCL10 leads to apoptosis in fetal neurons [40] that is triggered  
448 by intracellular Ca(2+) elevation activating caspase-9 and caspase-3 [43]. CXCL10 has  
449 also been strongly implicated in Guillain-Barré syndrome pathogenesis [44]. Thus, we  
450 hypothesize that the high elevations of CXCL10 in ZIKV patients may contribute to

451 neuronal damage affecting the developing fetal brain and potentially targeting  
452 peripheral nerves in Guillain-Barré syndrome as well. Consistent with this hypothesis,  
453 Kam et al. specifically identified higher levels of CXCL10 in ZIKV-infected patients with  
454 neurological complications compared to those without and higher levels of CXCL10 in  
455 ZIKV-infected pregnant women carrying babies with fetal growth associated  
456 malformations.  
457 High levels of CXCL10 have been previously described at acute and convalescent  
458 phases, with more prominent expression at the latter [8]. Unfortunately, although our  
459 data strongly suggest CXCL10 as a biomarker of ZIKV acute infection, we were unable  
460 to perform a longitudinal analysis to verify its kinetics across different stages of the  
461 disease, to further confirm whether the concentrations of this chemokine would be down  
462 or up-regulated. In addition, CXCL10 elevation is also observed in pre-eclampsia and  
463 hypertension found in pregnancy resulting in a range of fetal injuries, including  
464 intrauterine growth retardation and neurological damage induced by hypoxia [45,46].  
465 Thus, it is reasonable to suggest that ZIKV-induced inflammation may increase fetal  
466 injuries.  
467 CXCL10 may also be an important therapeutic target [40]. For example, CXCL10  
468 neutralization by specific antibodies or genetic deletion in CXCL10<sup>-/-</sup> mice protected  
469 against cerebral malaria infection and inflammation [47]. Passive transfer of anti-  
470 CXCL10 antibodies reduced inflammatory leukocyte recruitment across the blood brain  
471 barrier. Furthermore, statin medications commonly used for cholesterol control have  
472 been shown to decrease CXCL10 and to be effective in CXCL10 mediated Crohn's  
473 disease [48].  
474 Finally, we describe the relationship between the timing of viremia and cytokine  
475 elevations. The acute phase of ZIKV infection lasts around five days [49]. This study

476 assessed the acute phase biomarkers and viral titers at different time-points (until day 5).  
477 Augmented levels of CCL4, CCL2, CCL5, CXCL5, CXCL10, IL-6, IL-4, PDGF, and  
478 G-CSF immunomodulators were observed at all time-points. The peak of viremia, at  
479 Day 2 and Day 4, was accompanied by increased TNF- $\alpha$  levels. Instead, the IL-10  
480 elevation appeared to be directly related to the lowest virus titers (Day 3 and Day 5),  
481 while the highest levels of IL-12 were found at Day 5. These findings allow us to  
482 deduce that the acute phase of ZIKV is characterized mainly by an innate immune  
483 system inflammatory response, with the overlap of the inflammatory biomarkers and  
484 viremia peaks, and anti-inflammatory response coinciding with viremia decay.

485 Altogether, this study identifies unique characteristics of the acute inflammatory and  
486 multifactorial immune response induced by ZIKV and depicts CXCL10 as a potential  
487 biomarker of the acute infection, perhaps, a predictor of severity. Nevertheless, further  
488 longitudinal studies that measure the host immunopathological aspects at several time-  
489 points is required to better characterize all the immunological factors involved in the  
490 Zika disease. The elevated concentrations of serum biomarkers observed in this study,  
491 may bring new insights to the ZIKV immunopathology puzzle.

492

### 493 **Acknowledgments**

494 The authors are thankful to the Programa de Desenvolvimento Tecnológico em Insumos  
495 para a Saúde - PDTIS-FIOCRUZ for the use the flow cytometry (CPqRR) and Real-  
496 Time PCR (ILMD) facilities.

497

### 498 **References**

499 1. Musso D, Gubler DJ. Zika Virus. Clin Microbiol Rev. American Society for  
500 Microbiology; 2016;29: 487–524. doi:10.1128/CMR.00072-15

- 501 2. Duffy MR, Chen T-H, Hancock WT, Powers AM, Kool JL, Lanciotti RS, et al.  
502 Zika virus outbreak on Yap Island, Federated States of Micronesia. *N Engl J*  
503 *Med.* 2009;360: 2536–2543. doi:10.1056/NEJMoa0805715
- 504 3. Oehler E, Watrin L, Larre P, Leparc-Goffart I, Lastere S, Valour F, et al. Zika  
505 virus infection complicated by Guillain-Barre syndrome--case report, French  
506 Polynesia, December 2013. *Euro Surveill.* 2014;19.
- 507 4. Kleber de Oliveira W, Cortez-Escalante J, De Oliveira WTGH, do Carmo GMI,  
508 Henriques CMP, Coelho GE, et al. Increase in Reported Prevalence of  
509 Microcephaly in Infants Born to Women Living in Areas with Confirmed Zika  
510 Virus Transmission During the First Trimester of Pregnancy - Brazil, 2015.  
511 *MMWR Morb Mortal Wkly Rep.* 2016;65: 242–247.  
512 doi:10.15585/mmwr.mm6509e2
- 513 5. Cauchemez S, Besnard M, Bompard P, Dub T, Guillemette-Artur P, Eyrolle-  
514 Guignot D, et al. Association between Zika virus and microcephaly in French  
515 Polynesia, 2013–15: a retrospective study. *The Lancet.* Elsevier; 2016;387:  
516 2125–2132. doi:10.1016/S0140-6736(16)00651-6
- 517 6. França GVA, Schuler-Faccini L, Oliveira WK, Henriques CMP, Carmo EH, Pedi  
518 VD, et al. Congenital Zika virus syndrome in Brazil: a case series of the first  
519 1501 livebirths with complete investigation. *Lancet.* Elsevier; 2016;388: 891–  
520 897. doi:10.1016/S0140-6736(16)30902-3
- 521 7. Hamel R, Dejarnac O, Wichit S, Ekchariyawat P, Neyret A, Luplertlop N, et al.  
522 Biology of Zika Virus Infection in Human Skin Cells. Diamond MS, editor. *J*  
523 *Virol.* American Society for Microbiology; 2015;89: 8880–8896.  
524 doi:10.1128/JVI.00354-15
- 525 8. Tappe D, Pérez-Girón JV, Zammarchi L, Rissland J, Ferreira DF, Jaenisch T, et  
526 al. Cytokine kinetics of Zika virus-infected patients from acute to reconvalescent  
527 phase. *Med Microbiol Immunol.* Springer Berlin Heidelberg; 2015;205: 1–5.  
528 doi:10.1007/s00430-015-0445-7
- 529 9. Kam YW, Leite JA, Lum FM, Tan J. Specific biomarkers associated with  
530 neurological complications and congenital CNS abnormalities from Zika virus-  
531 infected patients in Brazil. *The Journal of ....* 2017.
- 532 10. Lanciotti RS, Kosoy OL, Laven JJ, Velez JO, Lambert AJ, Johnson AJ, et al.  
533 Genetic and Serologic Properties of Zika Virus Associated with an Epidemic,  
534 Yap State, Micronesia, 2007. *Emerging Infect Dis.* Centers for Disease Control  
535 and Prevention; 2008;14: 1232–1239. doi:10.3201/eid1408.080287
- 536 11. Lanciotti RS, Kosoy OL, Laven JJ, Panella AJ, Velez JO, Lambert AJ, et al.  
537 Chikungunya virus in US travelers returning from India, 2006. *Emerging Infect*  
538 *Dis.* 2007;13: 764–767. doi:10.3201/eid1305.070015
- 539 12. Gurukumar KR, Priyadarshini D, Patil JA, Bhagat A, Singh A, Shah PS, et al.  
540 Development of real time PCR for detection and quantitation of Dengue Viruses.  
541 *Virol J.* BioMed Central Ltd; 2009;6: 10. doi:10.1186/1743-422X-6-10



- 542 13. Luiza-Silva M, Campi-Azevedo AC, Batista MA, Martins MA, Avelar RS, da  
543 Silveira Lemos D, et al. Cytokine signatures of innate and adaptive immunity in  
544 17DD yellow fever vaccinated children and its association with the level of  
545 neutralizing antibody. *J Infect Dis.* Oxford University Press; 2011;204: 873–883.  
546 doi:10.1093/infdis/jir439
- 547 14. Klein SL. Sex influences immune responses to viruses, and efficacy of  
548 prophylaxis and treatments for viral diseases. *Bioessays.* WILEY-VCH Verlag;  
549 2012;34: 1050–1059. doi:10.1002/bies.201200099
- 550 15. De Figueiredo RMP, Thatcher BD, de Lima ML, Almeida TC, Alecrim WD,  
551 Guerra MV de F. [Exanthematous diseases and the first epidemic of dengue to  
552 occur in Manaus, Amazonas State, Brazil, during 1998-1999]. *Rev Soc Bras Med*  
553 *Trop.* 2004;37: 476–479.
- 554 16. Figueiredo RMP de, Naveca FG, Oliveira CM, Bastos M de S, Mourão MPG,  
555 Viana S de S, et al. Co-infection of Dengue virus by serotypes 3 and 4 in patients  
556 from Amazonas, Brazil. *Rev Inst Med Trop Sao Paulo.* 2011;53: 321–323.
- 557 17. Figueiredo RMP de, Naveca FG, Bastos M de S, Melo MDN, Viana S de S,  
558 Mourão MPG, et al. Dengue virus type 4, Manaus, Brazil. *Emerging Infect Dis.*  
559 2008;14: 667–669. doi:10.3201/eid1404.071185
- 560 18. de-Oliveira-Pinto LM, Marinho CF, Povia TF, de Azeredo EL, de Souza LA,  
561 Barbosa LDR, et al. Regulation of inflammatory chemokine receptors on blood T  
562 cells associated to the circulating versus liver chemokines in dengue fever. Proost  
563 P, editor. *PLoS ONE.* Public Library of Science; 2012;7: e38527.  
564 doi:10.1371/journal.pone.0038527
- 565 19. Meulen ter J, Sakho M, Koulemou K, Magassouba N, Bah A, Preiser W, et al.  
566 Activation of the cytokine network and unfavorable outcome in patients with  
567 yellow fever. *J Infect Dis.* Oxford University Press; 2004;190: 1821–1827.  
568 doi:10.1086/425016
- 569 20. Kumar M, Verma S, Nerurkar VR. Pro-inflammatory cytokines derived from  
570 West Nile virus (WNV)-infected SK-N-SH cells mediate neuroinflammatory  
571 markers and neuronal death. *J Neuroinflammation.* BioMed Central; 2010;7: 73.  
572 doi:10.1186/1742-2094-7-73
- 573 21. Rothman AL. Immunity to dengue virus: a tale of original antigenic sin and  
574 tropical cytokine storms. *Nat Rev Immunol.* 2011;11: 532–543.  
575 doi:10.1038/nri3014
- 576 22. Tseng C-S, Lo H-W, Teng H-C, Lo W-C, Ker C-G. Elevated levels of plasma  
577 VEGF in patients with dengue hemorrhagic fever. *FEMS Immunol Med*  
578 *Microbiol.* The Oxford University Press; 2005;43: 99–102.  
579 doi:10.1016/j.femsim.2004.10.004
- 580 23. Chirathaworn C, Poovorawan Y, Lertmaharit S, Wuttirattanakowit N. Cytokine  
581 levels in patients with chikungunya virus infection. *Asian Pac J Trop Med.*  
582 2013;6: 631–634. doi:10.1016/S1995-7645(13)60108-X

- 583 24. Sathupan P, Khongphattanayothin A, Srisai J, Srikaew K, Poovorawan Y. The  
584 role of vascular endothelial growth factor leading to vascular leakage in children  
585 with dengue virus infection. *Ann Trop Paediatr.* 2007;27: 179–184.  
586 doi:10.1179/146532807X220280
- 587 25. Werner S, Grose R. Regulation of wound healing by growth factors and  
588 cytokines. *Physiol Rev. American Physiological Society;* 2003;83: 835–870.  
589 doi:10.1152/physrev.00031.2002
- 590 26. Hiley CT, Chard LS, Gangeswaran R, Tysome JR, Briat A, Lemoine NR, et al.  
591 Vascular endothelial growth factor A promotes vaccinia virus entry into host  
592 cells via activation of the Akt pathway. *J Virol. American Society for*  
593 *Microbiology;* 2013;87: 2781–2790. doi:10.1128/JVI.00854-12
- 594 27. Zlotnik A, Yoshie O. The chemokine superfamily revisited. *Immunity. Elsevier;*  
595 *2012;36: 705–716.* doi:10.1016/j.immuni.2012.05.008
- 596 28. Ming WJ, Bersani L, Mantovani A. Tumor necrosis factor is chemotactic for  
597 monocytes and polymorphonuclear leukocytes. *J Immunol.* 1987;138: 1469–  
598 1474.
- 599 29. Murooka TT, Rahbar R, Plataniias LC, Fish EN. CCL5-mediated T-cell  
600 chemotaxis involves the initiation of mRNA translation through mTOR/4E-BP1.  
601 *Blood. American Society of Hematology;* 2008;111: 4892–4901.  
602 doi:10.1182/blood-2007-11-125039
- 603 30. FENNER F. The pathogenesis of the acute exanthems; an interpretation based on  
604 experimental investigations with mousepox; infectious ectromelia of mice. *The*  
605 *Lancet.* 1948;2: 915–920.
- 606 31. Murray PR, Rosenthal KS, Pfaller MA. *Medical Microbiology. Elsevier Health*  
607 *Sciences;* 2015.
- 608 32. Mellor PS, Hamblin C. African horse sickness. *Vet Res. EDP Sciences;* 2004;35:  
609 445–466. doi:10.1051/vetres:2004021
- 610 33. Bowen GS. Prolonged western equine encephalitis viremia in the Texas tortoise  
611 (*Gopherus berlandieri*). *Am J Trop Med Hyg.* 1977;26: 171–175.
- 612 34. Paessler S, Pfeffer M. Togaviruses Causing Encephalitis. *Encyclopedia of*  
613 *Virology. Elsevier;* 2008. pp. 76–82. doi:10.1016/B978-012374410-4.00630-0
- 614 35. Campi-Azevedo AC, de Almeida Estevam P, Coelho-Dos-Reis JG, Peruhype-  
615 Magalhães V, Villela-Rezende G, Quaresma PF, et al. Subdoses of 17DD yellow  
616 fever vaccine elicit equivalent virological/immunological kinetics timeline. *BMC*  
617 *Infect Dis. BioMed Central;* 2014;14: 391. doi:10.1186/1471-2334-14-391
- 618 36. Wang T, Town T, Alexopoulou L, Anderson JF, Fikrig E, Flavell RA. Toll-like  
619 receptor 3 mediates West Nile virus entry into the brain causing lethal  
620 encephalitis. *Nat Med.* 2004;10: 1366–1373. doi:10.1038/nm1140
- 621 37. Melchjorsen J, Sørensen LN, Paludan SR. Expression and function of

- 622 chemokines during viral infections: from molecular mechanisms to in vivo  
623 function. *J Leukoc Biol.* 2003;74: 331–343.
- 624 38. Klein RS, Lin E, Zhang B, Luster AD, Tollett J, Samuel MA, et al. Neuronal  
625 CXCL10 directs CD8+ T-cell recruitment and control of West Nile virus  
626 encephalitis. *J Virol. American Society for Microbiology*; 2005;79: 11457–  
627 11466. doi:10.1128/JVI.79.17.11457-11466.2005
- 628 39. Hsieh M-F, Lai S-L, Chen J-P, Sung J-M, Lin Y-L, Wu-Hsieh BA, et al. Both  
629 CXCR3 and CXCL10/IFN-inducible protein 10 are required for resistance to  
630 primary infection by dengue virus. *J Immunol.* 2006;177: 1855–1863.
- 631 40. Liu M, Guo S, Hibbert JM, Jain V, Singh N, Wilson NO, et al. CXCL10/IP-10 in  
632 infectious diseases pathogenesis and potential therapeutic implications. *Cytokine*  
633 *Growth Factor Rev.* 2011;22: 121–130. doi:10.1016/j.cytogfr.2011.06.001
- 634 41. Sui Y, Potula R, Dhillon N, Pinson D, Li S, Nath A, et al. Neuronal apoptosis is  
635 mediated by CXCL10 overexpression in simian human immunodeficiency virus  
636 encephalitis. *Am J Pathol.* 2004;164: 1557–1566. doi:10.1016/S0002-  
637 9440(10)63714-5
- 638 42. Hayney MS, Henriquez KM, Barnet JH, Ewers T, Champion HM, Flannery S, et  
639 al. Serum IFN- $\gamma$ -induced protein 10 (IP-10) as a biomarker for severity of acute  
640 respiratory infection in healthy adults. *J Clin Virol.* 2017;90: 32–37.  
641 doi:10.1016/j.jcv.2017.03.003
- 642 43. Sui Y, Stehno-Bittel L, Li S, Loganathan R, Dhillon NK, Pinson D, et al.  
643 CXCL10-induced cell death in neurons: role of calcium dysregulation. *Eur J*  
644 *Neurosci.* Blackwell Publishing Ltd; 2006;23: 957–964. doi:10.1111/j.1460-  
645 9568.2006.04631.x
- 646 44. Chiang S, Ubogu EE. The role of chemokines in Guillain-Barré syndrome.  
647 *Muscle Nerve.* 2013;48: 320–330. doi:10.1002/mus.23829
- 648 45. Gotsch F, Romero R, Friel L, Kusanovic JP, Espinoza J, Erez O, et al.  
649 CXCL10/IP-10: a missing link between inflammation and anti-angiogenesis in  
650 preeclampsia? *J Matern Fetal Neonatal Med.* 2007;20: 777–792.  
651 doi:10.1080/14767050701483298
- 652 46. Uzan J, Carbonnel M, Piconne O, Asmar R, Ayoubi J-M. Pre-eclampsia:  
653 pathophysiology, diagnosis, and management. *Vasc Health Risk Manag.* Dove  
654 Press; 2011;7: 467–474. doi:10.2147/VHRM.S20181
- 655 47. Nie CQ, Bernard NJ, Norman MU, Amante FH, Lundie RJ, Crabb BS, et al. IP-  
656 10-mediated T cell homing promotes cerebral inflammation over splenic  
657 immunity to malaria infection. Riley EM, editor. *PLoS Pathog.* Public Library of  
658 Science; 2009;5: e1000369. doi:10.1371/journal.ppat.1000369
- 659 48. Grip O, Janciauskiene S. Atorvastatin reduces plasma levels of chemokine  
660 (CXCL10) in patients with Crohn's disease. Timmer A, editor. *PLoS ONE.*  
661 Public Library of Science; 2009;4: e5263. doi:10.1371/journal.pone.0005263

- 662 49. Nayak S, Lei J, Pekosz A, Klein S, Burd I. Pathogenesis and Molecular  
663 Mechanisms of Zika Virus. *Semin Reprod Med.* Thieme Medical Publishers;  
664 2016;34: 266–272. doi:10.1055/s-0036-1592071

665

**Fig 1.** Immunological biomarkers correlations with the results of routine laboratorial tests, age, viremia, and symptoms

Correlation Matrix

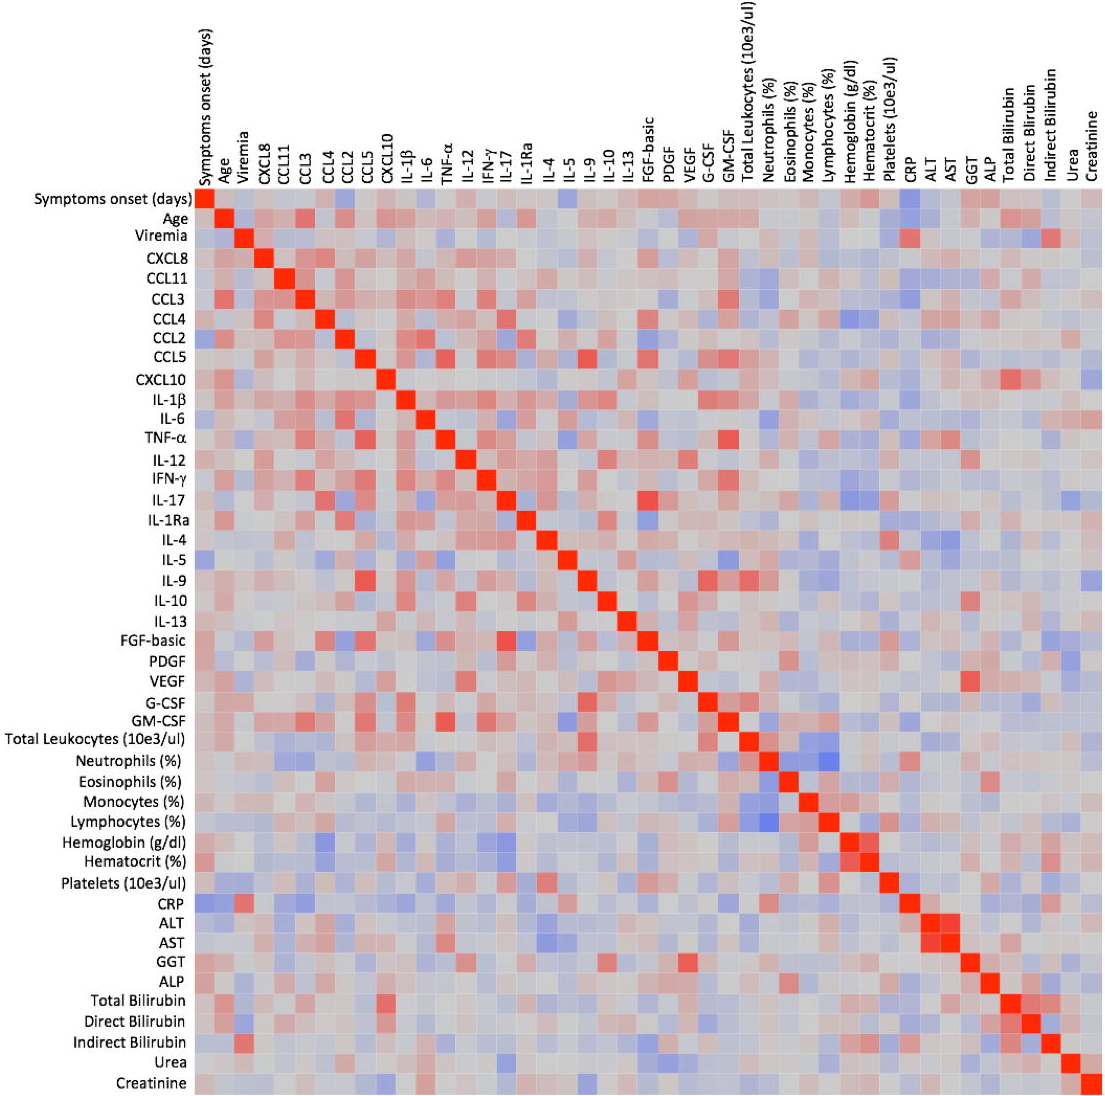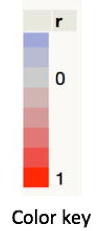

Correlation Indices

| Source attributes                      | Target attributes     | Spearman ρ | p values |
|----------------------------------------|-----------------------|------------|----------|
| ALP                                    | Viremia               | -0,5613    | 0,01     |
| ALT                                    | CCL4                  | 0,4492     | 0,04     |
| AST                                    | IL-4                  | -0,5532    | 0,01     |
| AST                                    | CXCL10                | 0,457      | 0,04     |
| AST                                    | CCL4                  | 0,4764     | 0,03     |
| AST                                    | CCL5                  | 0,4554     | 0,04     |
| C-reactive protein (CRP)               | Symptoms onset (days) | -0,4886    | 0,03     |
| C-reactive protein (CRP)               | Viremia               | 0,5449     | 0,01     |
| C-reactive protein (CRP)               | CXCL10                | -0,4976    | 0,03     |
| C-reactive protein (CRP)               | CCL3                  | -0,4645    | 0,04     |
| Creatinine                             | IL-9                  | -0,6443    | 0,001    |
| Direct Bilirubin                       | G-CSF                 | -0,5576    | 0,01     |
| GGT                                    | IL-10                 | 0,4671     | 0,04     |
| GGT                                    | VEGF                  | 0,5969     | 0,007    |
| Hematocrit (%)                         | IL-17                 | -0,5144    | 0,01     |
| Hematocrit (%)                         | CCL4                  | -0,4756    | 0,02     |
| Hemoglobin (g/dL)                      | IL-1β                 | -0,437     | 0,04     |
| Hemoglobin (g/dL)                      | IL-9                  | -0,4476    | 0,04     |
| Hemoglobin (g/dL)                      | IL-17                 | -0,6159    | 0,003    |
| Hemoglobin (g/dL)                      | IFN-γ                 | -0,4946    | 0,02     |
| Hemoglobin (g/dL)                      | CCL4                  | -0,4678    | 0,03     |
| Indirect Bilirubin                     | FGF basic             | -0,4542    | 0,04     |
| Lymphocytes (%)                        | CCL8                  | -0,4811    | 0,03     |
| Monocytes (%)                          | IL-9                  | -0,4497    | 0,04     |
| Neutrophils (%)                        | IL-13                 | 0,509      | 0,02     |
| Platelets (10 <sup>3</sup> /μL)        | Viremia               | -0,4333    | 0,04     |
| Total Leukocytes (10 <sup>3</sup> /μL) | IL-9                  | 0,6071     | 0,003    |
| Total Leukocytes (10 <sup>3</sup> /μL) | IL-10                 | 0,4709     | 0,03     |
| Urea                                   | IL-17                 | -0,4564    | 0,04     |
| Urea                                   | PDGF-bb               | -0,4928    | 0,02     |

**Fig 2.** Panoramic Overview of Serum Chemokines, Cytokines and Growth Factors Early After Zika Virus Infection in Adults

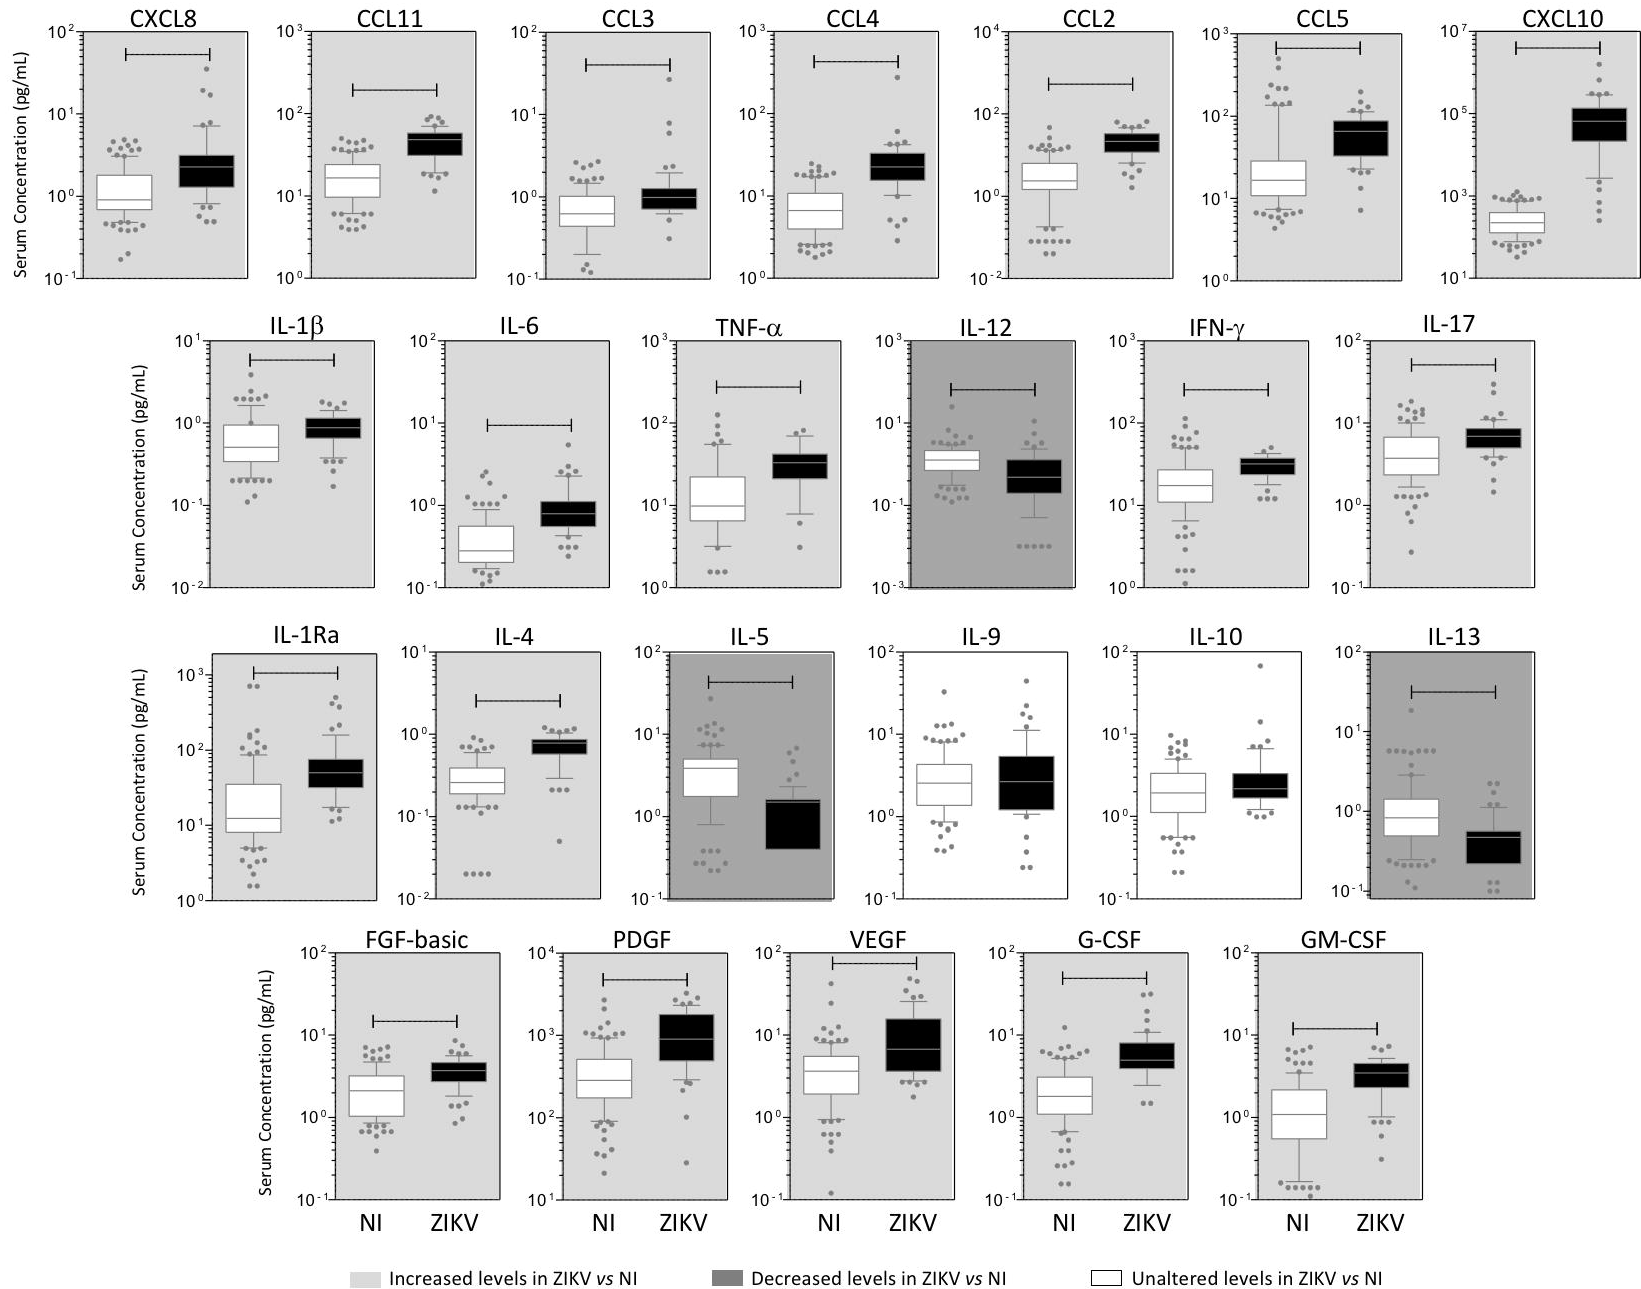

**Fig 3.** Rhythms of Viremia, Chemokines, Cytokines and Growth Factors Early After Zika Virus Infection in Adults

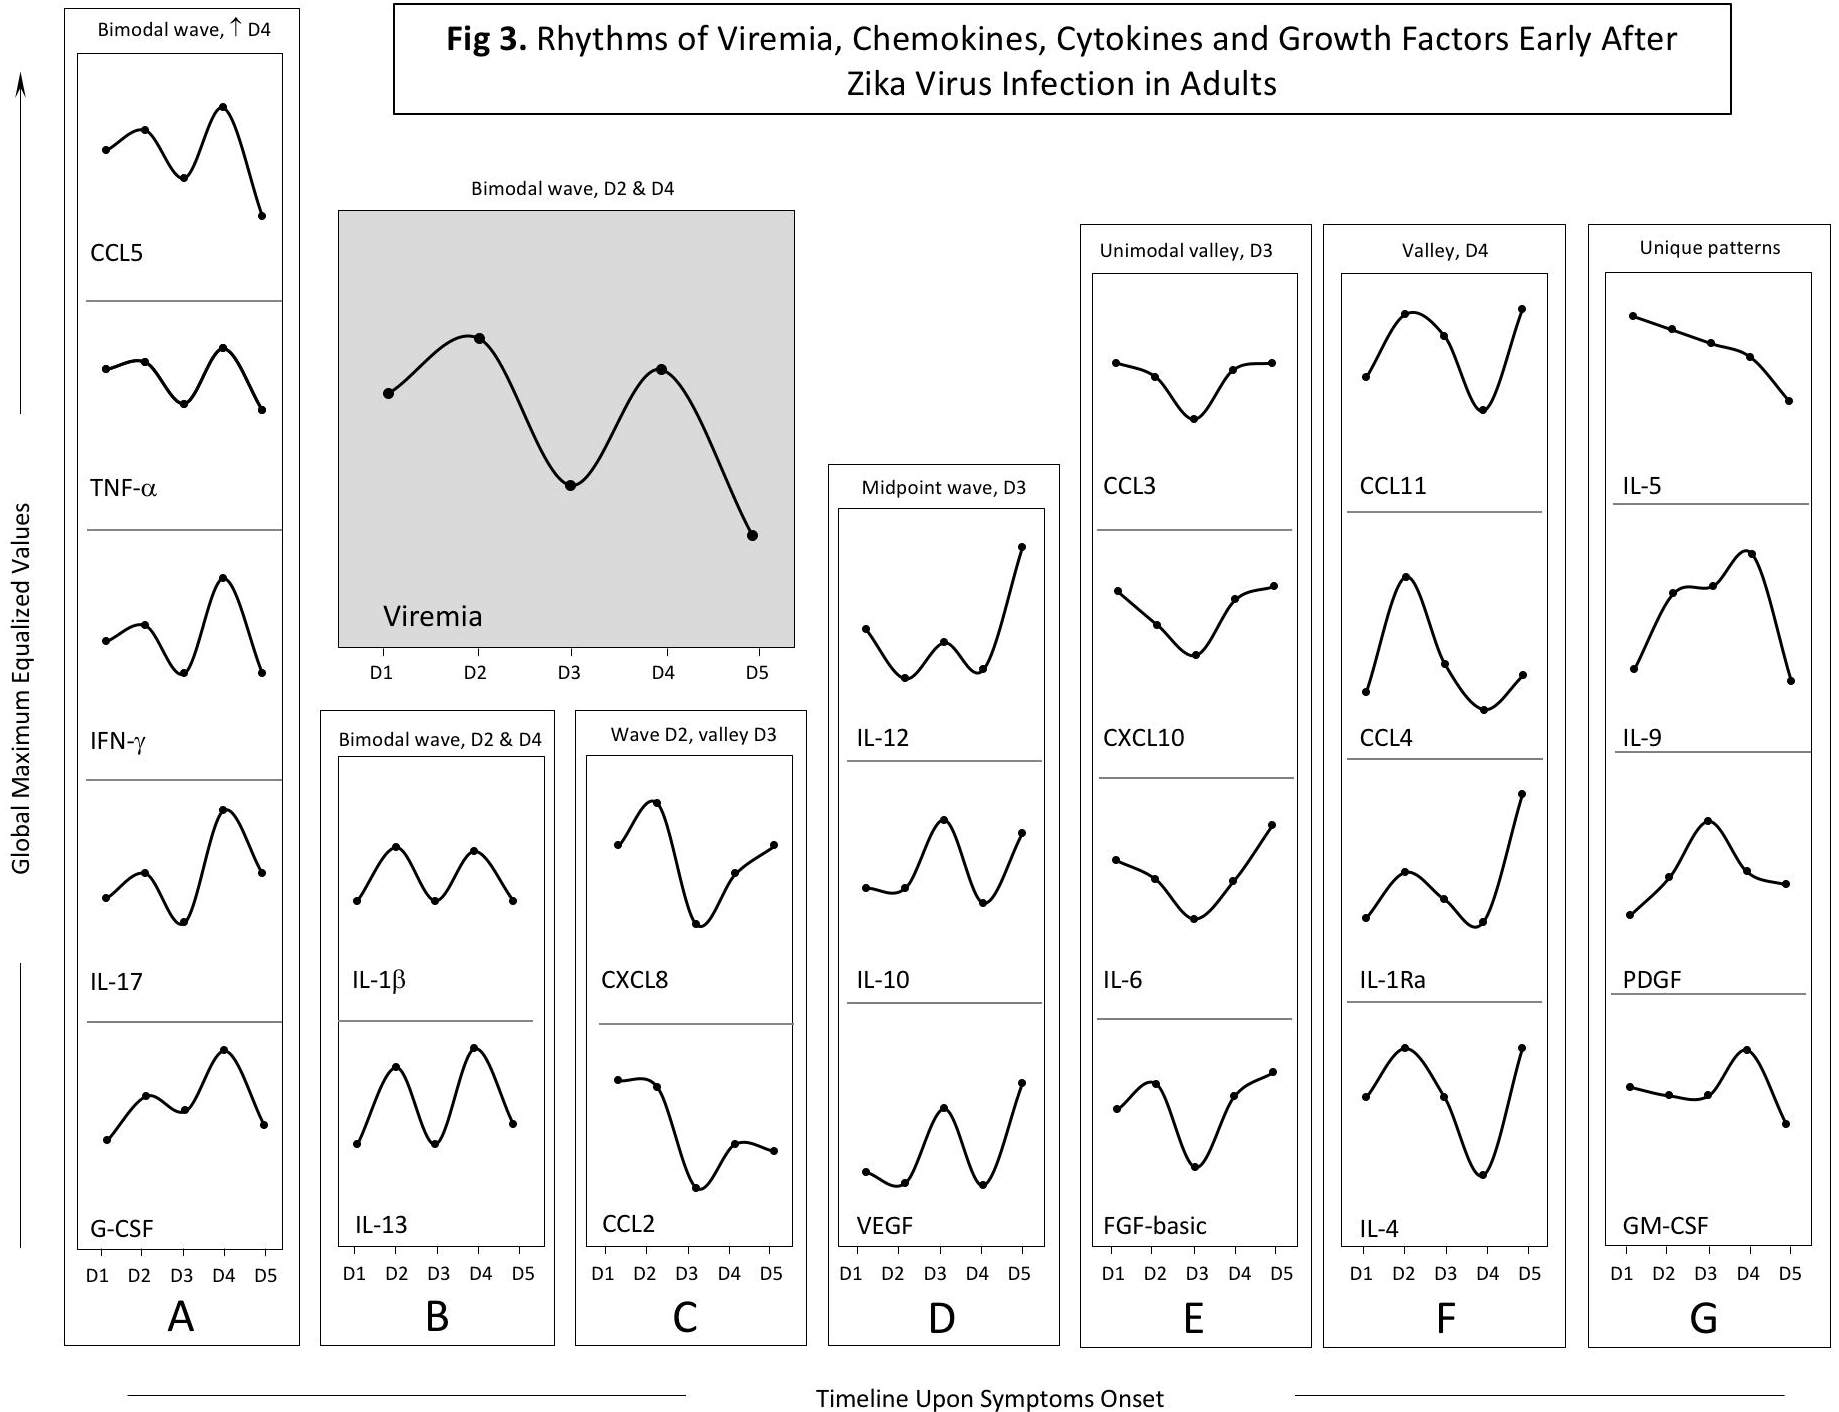

**Fig 4.** Kinetics of Viremia, Serum Chemokines, Cytokines and Growth Factors Early After Zika Virus Infection in Adults

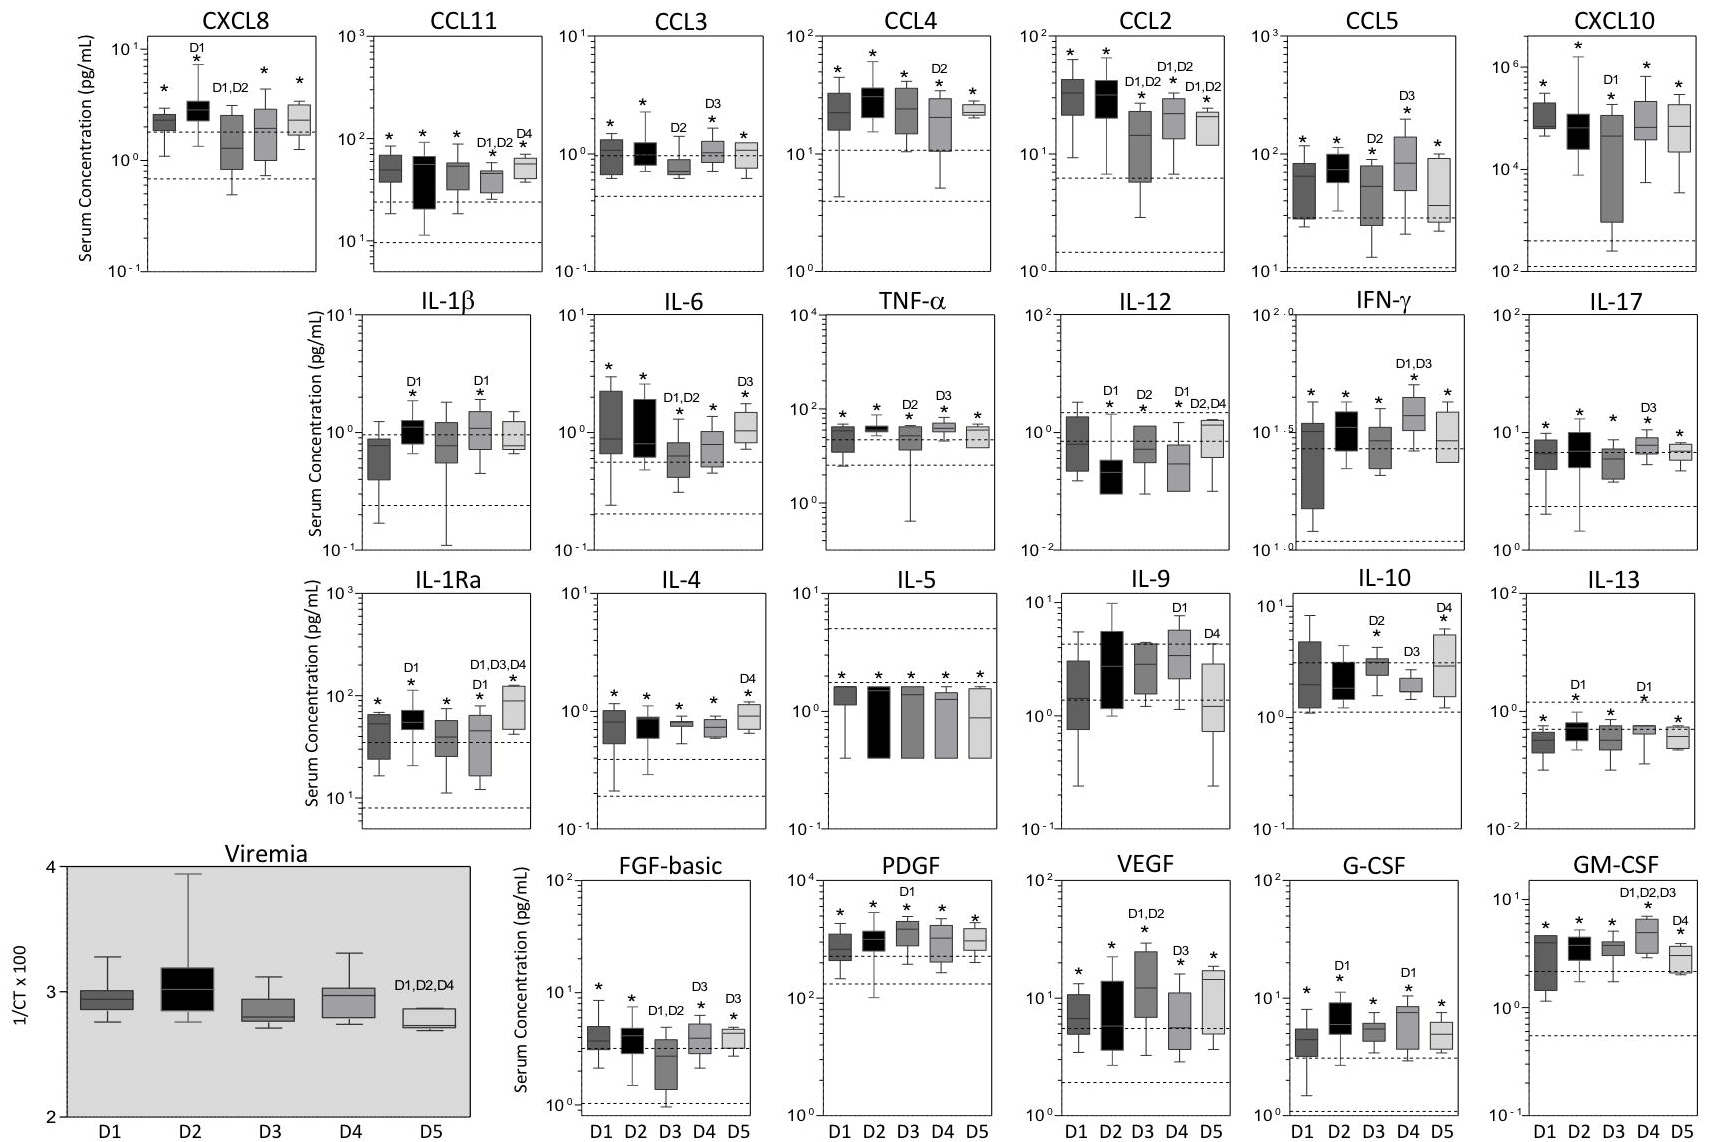

Timeline Upon Symptoms Onset



**Fig 5. General and Timeline Biomarkers upon Symptoms Onset Early After Zika Virus Infection in Adults**

Non-Infected Controls - NI

Zika Virus Infected Patients - ZIKV

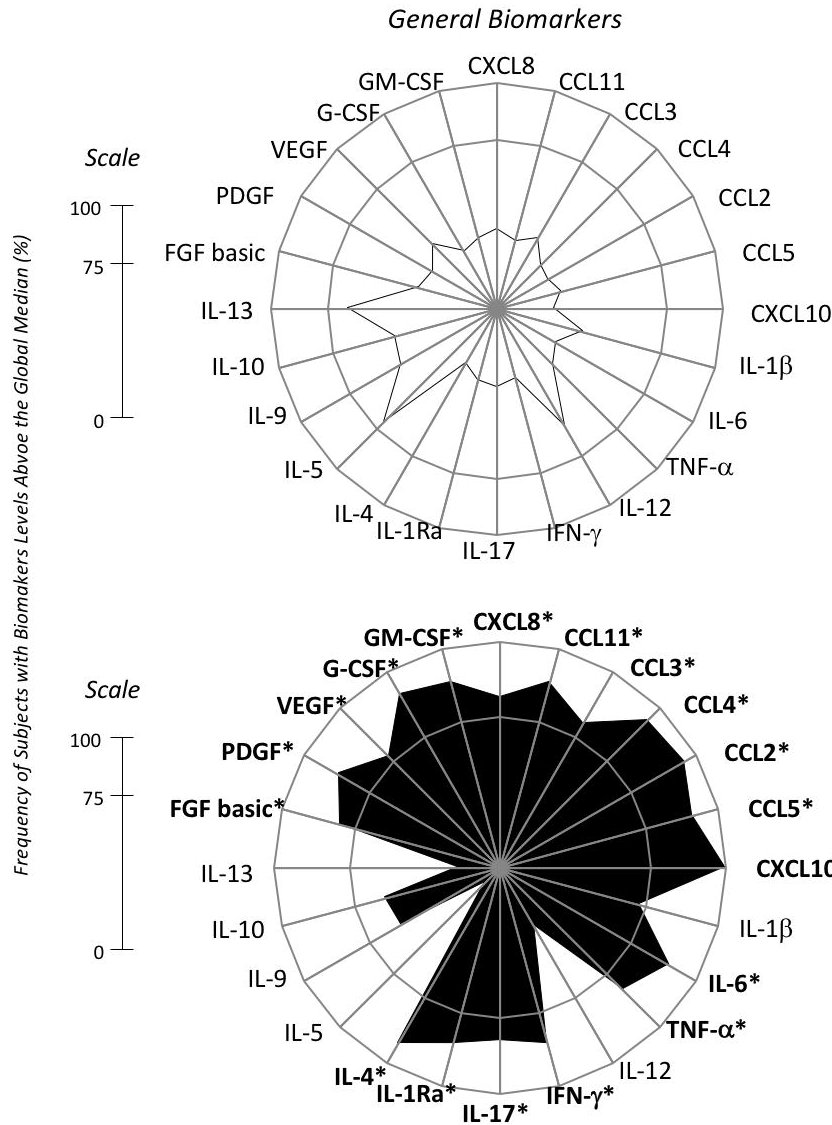

**Timeline Biomarkers Upon Symptoms Onset**

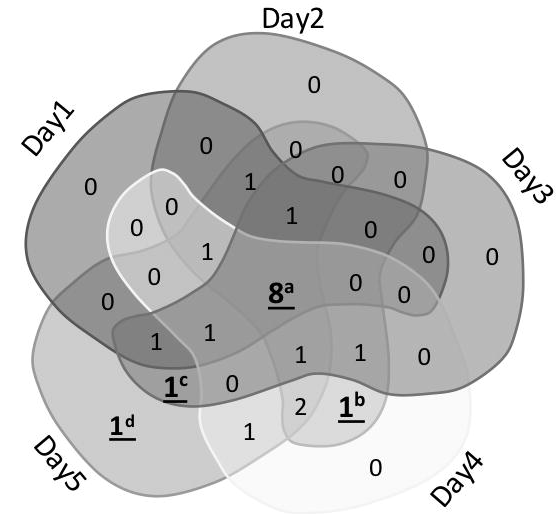

| <i>Days of Symptoms</i>         | <i>Intersections</i>                                                         |
|---------------------------------|------------------------------------------------------------------------------|
| <b><u>ALL<sup>a</sup></u></b>   | <b><u>CCL4,CCL2,CCL5,CXCL10</u></b><br><b><u>IL-6, IL-4, PDGF, G-CSF</u></b> |
| D1,D2,D3,D5                     | IL-1Ra                                                                       |
| D1,D2,D4,D5                     | IL-17                                                                        |
| D1,D3,D4,D5                     | CCL11                                                                        |
| D2,D3,D4,D5                     | IFN- $\gamma$                                                                |
| D1,D2,D5                        | CXCL8                                                                        |
| D1,D3,D5                        | VEGF                                                                         |
| D2,D3,D4                        | GM-CSF                                                                       |
| D2,D4,D5                        | CCL3,IL-1 $\beta$                                                            |
| <b><u>D2,D4<sup>b</sup></u></b> | <b><u>TNF-<math>\alpha</math></u></b>                                        |
| <b><u>D3,D5<sup>c</sup></u></b> | <b><u>IL-10</u></b>                                                          |
| D4,D5                           | FGF-basic                                                                    |
| <b><u>D5<sup>d</sup></u></b>    | <b><u>IL-12</u></b>                                                          |

\* Biomarkers with Levels Above the Global Median in >75% of Subjects

Biomarkers Labels: <sup>a</sup> Universal; <sup>b</sup> Peak of Viremia; <sup>c</sup> Valley of Viremia; <sup>d</sup> Late Biomarker

**Fig 6.** Timeline Biomarker Networks Early After Zika Virus Infection in Adults

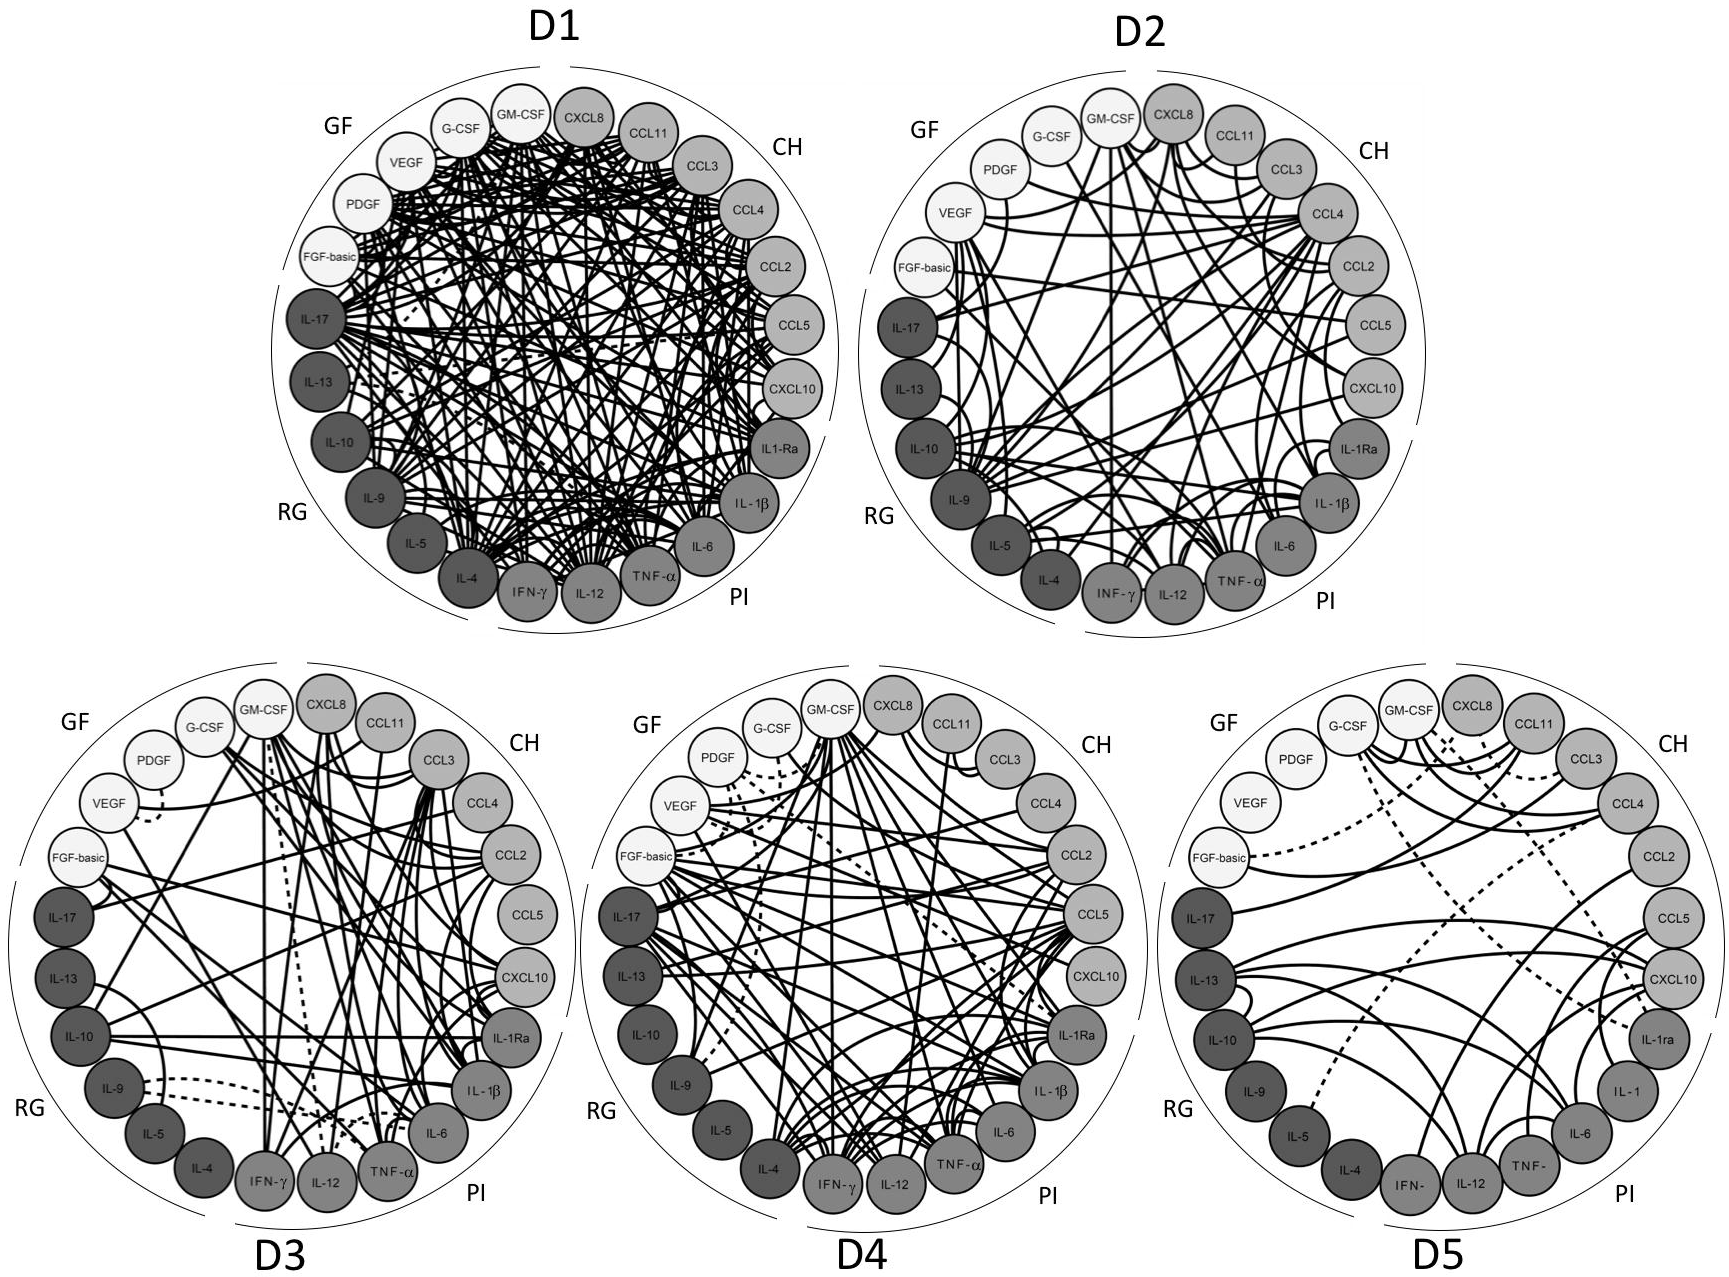

**Fig 7. High-dimensional Data Analysis Early After Zika Virus Infection in Adults**

*Heatmap Assemblage*

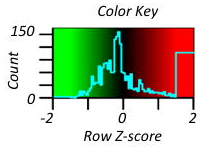

■ NI  
■ ZIKV

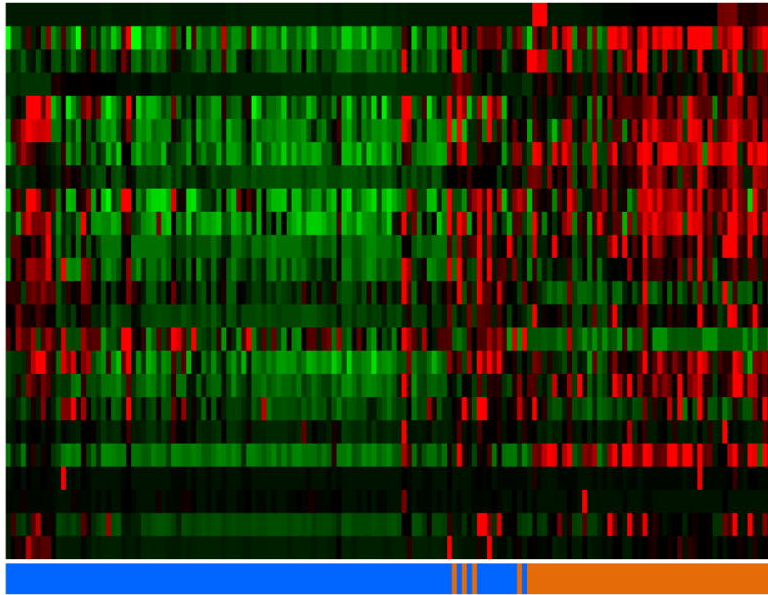

CXCL10  
 IL-4  
 VEGF  
 PDGF  
 IFN- $\gamma$   
 TNF- $\alpha$   
 CCL11  
 CCL4  
 FGF-basic  
 GM-CSF  
 IL-6  
 IL-1 $\beta$   
 IL-12  
 CXCL8  
 IL-5  
 IL-17  
 G-CSF  
 IL-9  
 IL-10  
 CCL2  
 CCL3  
 IL-13  
 IL-1Ra  
 CCL5

*Decision Tree Algorithm*

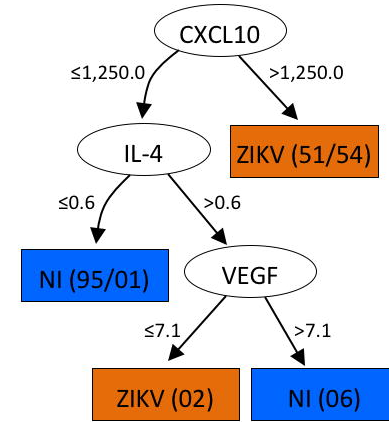

Global Accuracy = 99.4%  
 LOOCV = 96.8%

*3D-Plot of Major Attributes*

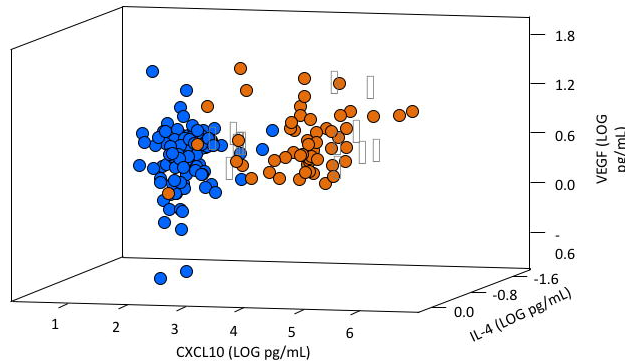

*Root Attribute Scatter Plot*

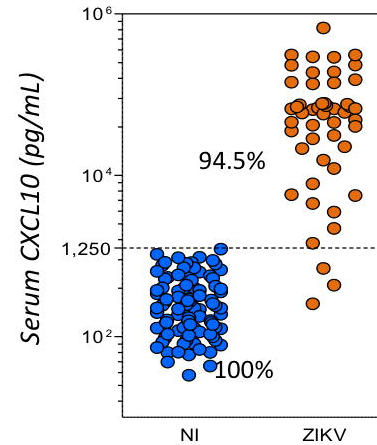

*ROC Curve Analysis*

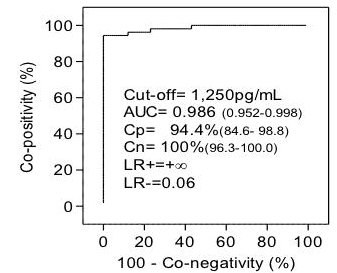

Source: https://www.biorxiv.org/content/10.1101/185041v1.full.pdf
